## 1 **Paracrine regulation of neural crest EMT by placodal MMP28**

2 Nadège Gougnard<sup>1,2</sup>, Anne Bibonne<sup>1</sup>, Joao F Mata<sup>3</sup>, Fernanda Bajanca<sup>1</sup>, Bianka Berki<sup>1</sup>, Elias H  
3 Barriga<sup>3</sup>, Jean-Pierre Saint-Jeannet<sup>2</sup> and Eric Theveneau<sup>1\*</sup>

4 1, Centre de Biologie du Développement (CBD), Centre de Biologie Intégrative (CBI), Université de Toulouse,  
5 CNRS, UPS, 118 route de Narbonne 31062, Toulouse Cedex 09, France.

6 2, New York University, College of Dentistry, Department of Molecular Pathobiology, 345E 24th street, New York  
7 NY 10010, USA.

8 3, Instituto Gulbenkian de Ciência, Mechanisms of Morphogenesis Lab, Rua da Quinta Grande n°6, 2780-156 Oeiras,  
9 Portugal.

10 Corresponding author: [eric.theveneau@univ-tlse3.fr](mailto:eric.theveneau@univ-tlse3.fr)

### 11 **Abstract**

12 Epithelial-Mesenchymal Transition (EMT) is an early event in cell dissemination from  
13 epithelial tissues. EMT endows cells with migratory, and sometimes invasive, capabilities and is  
14 thus a key process in embryo morphogenesis and cancer progression. So far, Matrix  
15 Metalloproteinases (MMPs) have not been considered as key players in EMT but rather studied  
16 for their role in matrix remodelling in later events such as cell migration *per se*. Here we used  
17 *Xenopus* neural crest cells to assess the role of MMP28 in EMT and migration *in vivo*. We  
18 provide strong evidence indicating that MMP28 produced by neighbouring placode cells is  
19 imported in the nucleus of neural crest cells for EMT and migration to occur.

### 21 **Keywords**

22 MMP28, EMT, neural crest, cell migration

## 24 **Introduction**

25 EMT is a complex process controlled by an array of transcription factors such as members  
26 of the *snai*, *twist*, *zeb* and *soxE* families (Brabletz et al., 2018; Nieto et al., 2016). During EMT,  
27 cells remodel their adhesion with other cells and the surrounding matrix and display increased  
28 cytoskeleton dynamics. These changes drive a change from an apicobasal polarity associated to  
29 epithelial stability to a front-rear polarity required for cell migration. EMT is essential for  
30 morphogenetic events such as ingression of mesodermal cells during gastrulation or emigration of  
31 neural crest cells from the neural tube but is also taking place in several diseases such as fibrosis  
32 and cancer (Brabletz et al., 2018; Lim and Thiery, 2012; Nieto et al., 2016; Thiery and Lim, 2013).  
33 EMT is an extremely complex and reversible process that is made of a series of non-obligatory  
34 steps. Therefore, despite conservation of the core changes taking place at the single cell level, a  
35 wealth of regulatory mechanisms has been identified at the molecular level. The way cells  
36 undertake EMT appears to be highly context-dependent and renders the task of agreeing on a  
37 common definition across fields all the more challenging but common lines are starting to emerge  
38 (Yang et al., 2020).

39 MMPs are secreted enzymes initially discovered for their ability to remodel the  
40 extracellular matrix (Iyer et al., 2012) and early evidence showed that MMPs could influence EMT  
41 via their role on the extracellular space (Illman et al., 2006; Radisky et al., 2005; Sternlicht et al.,  
42 1999). Somehow the link between EMT and MMPs was never fully explored. This leads to the  
43 current situation where MMPs are not considered as relevant markers or regulators of EMT (Yang  
44 et al., 2020). However, we now know that MMPs are pleiotropic players in health and diseases that  
45 can influence growth, survival and migration (Bonnans et al., 2014). MMPs have numerous non-  
46 canonical subcellular localizations (e.g mitochondria, nucleus, cytoplasm) and several unexpected

47 substrates have been described (e.g. cell adhesion molecules, growth factors, guidance cues) (Iyer  
48 et al., 2012; Jobin et al., 2017). These observations suggest numerous putative functions that are  
49 not related to the regulation of the extracellular matrix but the functional and physiological  
50 relevance of these potential non-canonical functions still awaits demonstration. In particular, it is  
51 interesting to note that most MMPs have been detected in the nucleus (Mannello and Medda, 2012)  
52 of at least one cell type and that some have been shown to exhibit transcriptional roles and DNA  
53 binding abilities (Eguchi et al., 2008; Marchant et al., 2014; Shimizu-Hirota et al., 2012). Given  
54 the frequent expression of MMPs by cells undergoing EMT, this calls for a re-assessment of their  
55 involvement in EMT independently of their effects on extracellular matrix.

56         Here we used *Xenopus* neural crest cells to assess the putative role of MMP28 in EMT.  
57 MMP28 is the latest member of the MMP family. It has a typical MMP structure with a secretion  
58 signal, a pro-domain that needs to be removed for complete enzymatic activity, and a hemopexin-  
59 like domain involved in cofactors binding and substrates recognition (Rodgers et al., 2009). Roles  
60 and functions of MMP28 are poorly described. It has been shown to be involved in wound healing  
61 and nerve repair (Rodgers et al., 2009). It is expressed in pulmonary fibrosis (Maldonado et al.,  
62 2018) and several human cancers including gastric cancer where it correlates with poor prognosis  
63 (Zhang et al., 2018).

64         Neural crest cells are multipotent stem cells that form at the interface between the neural  
65 and non-neural ectoderm (Mayor and Theveneau, 2013). They perform EMT to initiate cell  
66 migration and go on to colonize most tissues and organs of the developing embryo (Le Douarin  
67 and Dupin, 2012). Neural crest EMT relies on oncogenes such as *snai2* and *twist* (Gouignard et al.,  
68 2018). The neural crest EMT program is often hijacked by invasive cells during carcinoma  
69 progression (Kerosuo and Bronner-Fraser, 2012; Theveneau and Mayor, 2012) making these cells

70 an extremely relevant *in vivo* model to study EMT. Our data show that, during *Xenopus*  
71 development, MMP28 expressed in cranial placodes (Gougnard et al., 2020) is required for EMT  
72 of neural crest cells. MMP28 is secreted by placode cells, imported into the nucleus of adjacent  
73 neural crest cells where its catalytic activity is required for proper implementation of EMT via the  
74 maintenance of *twist* expression.

75 Overall, our results demonstrate a paracrine role for MMP28 in the EMT program of NC  
76 cells *in vivo* suggesting that such paracrine role might take place between other cells expressing  
77 MMPs such as fibroblasts and cancer cells.

78

## 79 **Results**

### 80 **MMP28 is required for the expression of multiple neural crest genes**

81 We found that MMP28, a secreted metalloproteinase, is expressed in cranial placodes  
82 adjacent to the cephalic neural crest (Gougnard et al., 2020) and given the known importance of  
83 neural crest interaction with placodes for normal neural crest migration (Theveneau et al., 2013),  
84 we decided to assess the putative role of placodal MMP28 for neural crest development. MMP28  
85 expression starts before the onset of neural crest migration (Fig. 1a-b) and comparison with markers  
86 for neural crest (*sox8* and *snai2*), neural plate (*sox2*) and placodes (*six1*) (Fig. 1b-c) confirms that  
87 MMP28 expression is restricted to the posterior part of the pan-placodal domain. MMP28  
88 expression is maintained in placodes at neural crest migration stages (Fig. 1d-e). To assess its  
89 functional relevance, we performed loss-of-function experiments using a splice blocking  
90 Morpholino directed against MMP28 (MMP28-MO<sub>sp1</sub>), whose efficiency was assessed by RT-  
91 PCR and qPCR (Fig. 1f-h). Knocking down MMP28 led to a severe down regulation of multiple

92 neural crest genes including *twist*, *sox10*, *snai2*, *sox8* and *foxd3* whereas other genes such as *snai1*  
93 and *sox9* were not affected (Fig. 1i-k). Importantly, MMP28 knockdown had no effect on non-  
94 neural ectoderm, neural plate or neural plate border gene expression and only marginal effects on  
95 placodes themselves with a slight reduction of *six1* expression but no effects on *eyal* or *foxi4.1*  
96 (Supplementary Fig. 1). This indicates that, while MMP28 is required for normal expression of  
97 multiple neural crest genes, the neural crest territory is still induced and properly positioned in  
98 absence of MMP28 and can be identified by the co-expression of *sox9* and *snai1*. To further  
99 substantiate this, we performed a TUNEL assay and found no induction of cell death after injection  
100 of the control MO or MMP28spl-MO (Supplementary Fig. 2) compared to the inhibition of Sf3b4  
101 that is known to specifically promote cell death in neural crest cells (Devotta et al., 2016).

102 *Sox10* being the most affected neural crest gene, we attempted to rescue its expression by  
103 co-injecting MMP28-MOspl together with wild-type MMP28 (MMP28wt) or a previously  
104 described (Rodgers et al., 2009) inactive point mutant version in which the catalytic activity is  
105 abolished (MMP28-EA). MMP28wt was sufficient to rescue *sox10* expression in morphant  
106 embryos (Fig. 1j and 1k, green bar) whereas MMP28-EA was not (Fig. 1j and 1k, white bar).  
107 Importantly, MMP28wt and MMP28-EA do not have a dominant-negative effect (Supplementary  
108 Fig. 3). This indicates that their respective abilities to rescue MMP28 loss-of-function cannot be  
109 explained by putative interference with other MMPs.

110 Therefore, these data show that MMP28 secreted by placodes is dispensable for the  
111 formation and positioning of the neural crest territory but that its catalytic activity is specifically  
112 required for the normal expression of multiple neural crest genes prior to neural crest migration.

113

114 **MMP28 is required for normal neural crest EMT and migration**

115            Since inhibition of MMP28 led to a reduction of important EMT regulators such as *twist*  
116 and *snai2*, we wanted to assess whether this translated into actual EMT and migration defects. First,  
117 we assessed the dorsoventral extension of neural crest streams after MMP28 knockdown with both  
118 Morpholinos (MOspl, MOatg) and found a severe reduction of the net distance migrated (Fig. 2a-  
119 b).

120            Second, we performed *ex vivo* neural crest culture (Gougnard et al., 2021) followed by  
121 time-lapse imaging to monitor cell dispersion (Fig. 2c-e, Supplementary Movie 1). Neural crest  
122 cells taken from embryos injected with a control Morpholino (CMO) extensively moved away from  
123 their initial position (Fig. 2c-e, black graph and curve), whereas cells coming from embryos in  
124 which MMP28 was knocked down (MOatg) failed to disperse (Fig. 2c-e, brown graph and curve  
125 Supplementary Movie 1). Importantly, the effect of knocking down MMP28 with MOatg can be  
126 rescued by expressing MMP28wt (Fig. 2c-e, blue graph and curve, Supplementary Movie 2) while  
127 overexpressing MMP28wt has no visible effect *ex vivo* (Fig. 2c-e, pink graph and curve,  
128 Supplementary Movie 2) in line with the lack of effect observed *in vivo* (Supplementary Fig. 3).

129            Third, we monitored the relative expression of cell adhesion molecules. To initiate  
130 migration, *Xenopus* neural crest cells downregulate the expression of E-cadherin and upregulate  
131 that of N-cadherin and cadherin-11 to perform contact-inhibition of locomotion (Becker et al.,  
132 2013; Langhe et al., 2016; Scarpa et al., 2015), and rely on  $\alpha 5\beta 1$  integrins and cadherin-11 to bind  
133 to Fibronectin (Alfandari et al., 2003; Langhe et al., 2016). Therefore, we assessed the expression  
134 of these genes in neural crest by qPCR after MMP28 knockdown, using the expression of *mmp28*,  
135 *sox10* and *twist* as internal controls for the MMP28-MO efficiency (Fig. 2f-g). Injection of the  
136 MMP28-MOspl reduced the expression of *mmp28*, *twist* and *sox10* by half confirming the  
137 efficiency of the knockdown in these samples. By contrast, MMP28 knockdown had no significant

138 effects on E- and N-cadherins compared to embryos injected with the control MO indicating that  
139 embryos with MMP28 knockdown have the expected low E-cadherin/high N-cadherin profile. By  
140 contrast, MMP28 knockdown severely reduced the expression of cadherin-11. Finally, integrin  
141 subunits  $\alpha 5$  and  $\beta 1$  were not affected (Fig. 2g). This indicates that MMP28-MO neural crest cells  
142 initiate EMT but fail to complete it. Altogether, these three independent analyses show that the  
143 inhibition of EMT transcription factors under MMP28 knockdown conditions translates into EMT  
144 and migration defects at tissue (Fig. 2a-b), cellular (Fig. 2c-e) and molecular (Fig. 2f-g) levels.

145  
146 **Twist expression is sufficient to rescue NC adhesion and migration in MMP28 knockdown**  
147 **embryos**

148 Given that the expressions of *twist*, an upstream regulator of EMT, and *cadherin-11*, a  
149 downstream effector of the EMT cascade, are severely affected by MMP28 knockdown we  
150 wondered whether forcing expression of either one of these genes might be sufficient to rescue  
151 MMP28 knockdown phenotype. For that, we co-injected MMP28-MOsp1 with the mRNA for *twist*  
152 or *cadherin-11* and analysed neural crest migration using *foxd3* expression (Fig. 3a-c). Embryos  
153 injected with the control MO displayed normal neural crest migration on both the uninjected and  
154 the injected sides while embryos injected with MMP28-MOsp1 had impaired neural crest migration  
155 on the injected side. Interestingly, co-injection with *twist* mRNA was sufficient to partially restore  
156 dorsoventral neural crest migration while co-injection of *cadherin-11* mRNA was not (Fig. 3b-c).

157 To better understand how these treatments affected neural crest cells, we plated the various  
158 conditions onto Fibronectin. First, we let explants migrate for 3 hours and fixed them for nuclear  
159 and actin staining with DAPI and Phalloidin, respectively (Fig. 3d-f). The explants that were still

160 attached after fixation were counted, washed and then stained. Fig. 3e shows a low magnification  
161 of each well with adhering explants outlined in purple and detached explants outlined in yellow. In  
162 control MO conditions and MMP28-MO+*twist* mRNA, all explants remained attached whereas  
163 after MMP28 knockdown only 5 out of 12 explants had a significant amount of cells left attached  
164 to the dish. Interestingly, in the MMP28-MO+*cadherin-11* mRNA, 8 out of 10 explants remained  
165 attached to the substrate (Fig 3e-f). We next looked at cell morphology. Cells injected with control  
166 MO or MMP28-MO together with *twist* or *cadherin-11* were able to flatten on the substrate and to  
167 form protrusions. By contrast, MMP28-MO cells were mostly round and poorly protrusive (Fig.  
168 3g). Importantly, the nuclear staining did not reveal any fragmented nuclei, in line with our in vivo  
169 TUNEL data (Supplementary Fig. 2). As a proxy for membrane dynamics, we looked at the size  
170 of protrusions in each condition. We measured the area of protrusions either directed toward a free  
171 space (Fig. 3h, outward protrusions) or in between cells (Fig. 3h, cryptic protrusions). *Twist* and  
172 *cadherin-11* mRNA were both sufficient to rescue protrusive activity in MMP28-MO cells (Fig.  
173 3h).

174 Next, we assessed cells dynamics by time-lapse imaging (Fig. 3i-k, Supplementary Movie  
175 3). Cells injected with control MO dispersed normally (Fig. 3i-k, black graphs and curves) while  
176 MMP28-MO cells were round and failed to significantly disperse (Fig. 3i-k, brown graphs and  
177 curves). Interestingly, expression of *Twist* was able to restore normal dispersion of MMP28-MO  
178 injected neural crest cells (Fig. 3i-k, blue graphs and curves) while expression of *cadherin-11* was  
179 unable to do so (Fig. 3i-k, pink graphs and curves). Altogether, these data indicate that *Twist* and  
180 *Cadherin-11* are essential players downstream of MMP28. *Cadherin-11* is sufficient to restore cell-  
181 matrix adhesion but this rescue of adhesion does not translate into an efficient rescue of cell motility



182 *in* or *ex vivo*. By contrast, Twist expression fully restores adhesion and dispersion *ex vivo* and  
183 significantly restores neural crest migration *in vivo*.

184

### 185 **MMP28 can traffic to the nucleus of neural crest cells**

186 Next, we wondered how MMP28 might affect the expression of neural crest genes while  
187 being produced by adjacent placodal cells. Despite being secreted, several MMPs, including  
188 MMP28, have been detected in the nucleus of various cell types (Maldonado et al., 2018; Mannello  
189 and Medda, 2012). Thus, we analysed the amino acid sequence of *Xenopus* MMP28 for putative  
190 nuclear export and nuclear localization signals (NES/NLS). We found 2 putative NES and 2  
191 putative NLS sites in MMP28 (Fig. 4a). To test whether MMP28 is able to traffic to the nucleus,  
192 we expressed a GFP-tagged version of MMP28 in *Xenopus* embryos, harvested embryos and  
193 performed cell fractionation followed by western blot (Fig. 4b). We found MMP28 in the  
194 membrane (Mem), the soluble cytosol (Cy) and the cytoskeleton-associated (CytoSK) fractions as  
195 well as the soluble (Sol) and chromatin-associated (Chr) nuclear fractions (Fig. 4b). To assess  
196 whether the MMP28 detected in the nuclear fractions might be due to contamination from the  
197 cytosolic fractions, we run the cytosolic and nuclear fractions from uninjected and embryos  
198 expressing MMP28-GFP in parallel and performed the immunoblots with anti-GFP (Fig. 4c) and  
199 anti-tubulin (Fig. 4d). No tubulin was found in nuclear extracts (Fig. 4d) while MMP28-GFP was  
200 clearly detected (Fig. 4c). This shows that the detection of MMP28 in nuclear fractions cannot be  
201 explained by a contamination from the cytosolic fraction.

202 To substantiate these data, we expressed MMP28-GFP in neural crest cells and performed  
203 anti-GFP immunostaining followed by 3D confocal imaging (Fig. 4e, Supplementary Movie 4).

204 Nuclei were counterstained with DAPI and the DAPI signal used as a mask to probe the amount of  
205 GFP signal embedded within it. Multiple GFP spots were detected in the nuclei of neural crest cells  
206 (Fig. 4e, zooms). To assess whether the addition of the GFP-tag might be responsible for a non-  
207 specific nuclear accumulation of MMP28, we performed the same experiment with a flag-tagged  
208 version of MMP28. MMP28-flag was also detected in the neural crest nuclei excluding the  
209 possibility that the GFP tag non-specifically drives MMP28 nuclear accumulation (Supplementary  
210 Movie 5).

211 *In vivo*, MMP28 is not expressed by neural crest cells but by nearby placodes. Therefore,  
212 to test whether MMP28 can traffic to neighbouring cells in a paracrine manner, we co-cultured  
213 control neural crest cells and cells expressing MMP28-GFP and performed anti-GFP  
214 immunostaining. We detected MMP28-GFP in the intercellular space between expressing and non-  
215 expressing cells as well as in the nucleus of non-expressing cells (Fig. 4f-g). To assess the  
216 specificity of the GFP immunostaining, we performed GFP immunodetection on uninjected cells  
217 and did not detect any significant staining under the same confocal conditions (Fig. 4h).

218

### 219 **MMP28 produced by placodal cells can be imported into neural crest cells' nuclei in vivo**

220 We next tested whether MMP28 could travel from placodes to neural crest cells *in vivo*  
221 within a time window compatible with normal neural crest-placodes interactions. To do so, we  
222 expressed in the ectoderm of *Xenopus* embryos MMP28wt-GFP, MMP28-EA-GFP or a secreted  
223 form of GFP containing the signal peptide of MMP28 as a control, and grafted neural crest explants  
224 labelled with rhodamine-dextran as a tracer (Fig. 5a). Embryos were fixed 4 hours after the graft  
225 and processed for histology and confocal imaging to monitor the raw GFP signal. MMP28-GFP

226 was detected in the cytoplasm and the nucleus of multiple neural crest cells located underneath the  
227 ectoderm expressing MMP28wt-GFP or MMP28-EA-GFP (Fig. 5b). By contrast, neural crest cells  
228 grafted near the ectoderm expressing secreted GFP had no GFP signal in their cytoplasm or nuclei,  
229 showing that GFP alone is not spontaneously endocytosed or imported in the nucleus. These data  
230 indicate that MMP28 is specifically imported and that the catalytic activity is not required for the  
231 import. To get a broader view of the distribution of MMP28-GFP in grafted neural crest cells, we  
232 performed similar grafts with MMP28wt-GFP followed by immunodetection of GFP  
233 (Supplementary Fig. 4). MMP28-GFP is not restricted to cells directly underneath the MMP28-  
234 expressing ectoderm and is found up to several cell diameters away from the ectoderm. By contrast,  
235 immunodetection against GFP on uninjected embryos led to no significant signals confirming the  
236 specificity of the observed staining (Supplementary Fig. 4). These data show that MMP28 can  
237 travel from the ectoderm, where placodes are located, to the nuclei of neural crest cells within a  
238 few hours *in vivo*.

239

#### 240 **Active MMP28 is required within the nuclei of neural crest cells for normal *twist* expression**

241 To show that MMP28 can travel to the nucleus of neural crest cells does not demonstrate  
242 that the nuclear localization *per se* is required for its role in neural crest development. MMP28  
243 being secreted from the placodes, it is likely that MMP28 might act at multiple locations along the  
244 paracrine route: the extracellular space, the cytoplasm and the nucleus. To assess that, we designed  
245 versions of MMP28 that would be either prevented from accumulating in the nucleus, by adding a  
246 strong NES signal or sequestered in the nucleus. For the later, we added a strong NLS. In addition,  
247 we also removed the secretion peptide ( $\Delta$ SP) so that the requirement of the extracellular  
248 localization could be assessed. We confirmed that the MMP28<sup>NES</sup> and MMP28 <sup>$\Delta$ SPNLS</sup> localized to

249 the expected cellular compartments (Fig. 6a-b). Since MMPs are usually activated by removal of  
250 their pro-domain while passing through the Golgi (Hadler-Olsen et al., 2011), we assessed whether  
251 deletion of the secretion peptide might affect removal of the pro-domain. We compared the profiles  
252 of MMP28wt, MMP28<sup>ΔSP</sup> and MMP28<sup>ΔSP/NLS</sup> in the soluble and chromatin-associated nuclear  
253 fractions by western blot. Indeed, preventing entry into the secretion pathway inhibited removal of  
254 the pro-domain (Supplementary Fig. 5). We then used the NES and ΔSPNLS versions of MMP28  
255 to attempt to rescue MMP28 knockdown *in vivo*. MMP28<sup>NES</sup>, which contains the normal signal  
256 peptide, was not able to rescue *sox10* or *twist* expression. By contrast, the non-secreted nuclear-  
257 targeted ΔSPNLS version of MMP28 was able to do so (fig. 6c-d).

258         Given that the ΔSPNLS form still has its pro-domain (Supplementary Fig. 5), this result  
259 suggests that the catalytic activity may not be required for MMP28 function in the nucleus.  
260 However, pro-MMPs have basal catalytic activity and can be further activated by a change of  
261 conformation known as an allosteric activation (Hadler-Olsen et al., 2011; Ra and Parks, 2007).  
262 Therefore, the rescue obtained with the ΔSPNLS form is not a definitive proof that catalytic activity  
263 is dispensable in the nucleus. To address this point, we generated a catalytically inactive version  
264 of the ΔSPNLS (MMP28<sup>EA/ΔSPNLS</sup>). Importantly, this catalytically inactive form of MMP28 was  
265 not able to rescue MMP28 knockdown (Fig. 6c-d) indicating that the catalytic activity of MMP28  
266 is indeed required within the nucleus.

267

## 268 **MMP28 interacts with the proximal promoter of *twist***

269         Finally, we wondered whether MMP28 might directly interact with the regulatory  
270 sequences of some of the downregulated NC genes. To assess that, we performed a chromatin-

271 immunoprecipitation (ChIP) assays followed by PCR (ChIP-PCR) against multiple portions of the  
272 proximal promoters of *sox10*, *cad11* and *twist* (Fig. 7a-b, Supplementary Fig. 6). We expressed  
273 MMP28-GFP and performed the immunoprecipitation using an anti-GFP (see methods). To detect  
274 potential non-specific interactions due to the GFP tag, we performed the ChIP-PCR from embryos  
275 expressing only GFP. As a positive control for the procedure, we used Twist-GFP. GFP showed  
276 very little non-specific binding to any regions of the different promoters (Fig. 7a-b, green lines)  
277 with the exception of one region along the *twist* promoter, which we thus ignored in all other  
278 conditions. By contrast, pull-down with MMP28 (Fig. 7a-b, magenta lines) and Twist (Fig. 7a-b,  
279 black lines) enriched all tested regions of the three promoters (Fig. 7a-b).

280         Next, given that other MMPs have been found to play some transcriptional roles (Eguchi et  
281 al., 2017; Marchant et al., 2014; Shimizu-Hirota et al., 2012), we asked whether the interactions  
282 with *sox10*, *cad11* and *twist* promoters were specific to MMP28 or might be due to a general ability  
283 of MMPs to interact with chromatin. During EMT and migration, *Xenopus* NC express MMP14  
284 (Garmon et al., 2018) which has previously been found to display some transcriptional roles in  
285 other cell types (Shimizu-Hirota et al., 2012). Using fractionation and western blot, we confirmed  
286 that MMP14 is also imported in the nucleus of *Xenopus* cells (Supplementary Fig. 7) making it a  
287 relevant MMP to compare with MMP28 in our ChIP-PCR experiment. Importantly, MMP14  
288 showed no affinity to *sox10* promoter's regions and a weaker affinity for those of *twist* and  
289 *cadherin-11* compared to MMP28. These data strongly suggest that the MMP28-promoters  
290 interaction identified here are specific to MMP28 and do not correspond to a general ability of  
291 MMPs to interact with chromatin.

292         Altogether, our data indicate that active MMP28 produced by placode cells needs to be  
293 imported into the nucleus of neural crest cells for normal Twist-dependent EMT and migration to

294 occur (Fig. 7c) and suggest that the maintenance of Twist expression might involve a direct  
295 physical interaction of MMP28 with the proximal promoter of Twist. Further work will be needed  
296 to explore the role of the catalytic activity in nucleus.

297

## 298 **Discussion**

299 We found that MMP28 is produced by cranial placodes but acts on neural crest cells.  
300 Interestingly, these two cell populations jointly form the cranial peripheral nervous system  
301 (Theveneau and Mayor, 2011) and are known to depend on one another for their normal  
302 development. Normal neural crest migration along the dorsoventral axis and patterning in discrete  
303 streams requires interactions with placodes on multiple levels. Placodes are the source of positive  
304 and negative regulators of neural crest migration such as Sdf1/CXCL12 and class3-semaphorins  
305 (Bajanca et al., 2019; Theveneau et al., 2010; Yu and Moens, 2005). Direct physical interaction  
306 between neural crest and placode cells via N-cadherin-dependent heterotypical contact-inhibition  
307 of locomotion drives the redistribution of placodal cells throughout the head which in turn helps  
308 splitting the neural crest population into streams (Szabó et al., 2019; Theveneau et al., 2013). These  
309 neural crest-placodes interactions are not specific to *Xenopus* development and are found in other  
310 vertebrates with some degree of conservation in terms of molecular and cellular mechanisms  
311 (Culbertson et al., 2011; Escot et al., 2013; Freter et al., 2013; Golding et al., 2000). MMP28 acts  
312 earlier than the previously identified mechanisms linking neural crest and placodes development.  
313 While physical interactions and secreted guidance cues directly influence cell motility and adhesion  
314 during migration, MMP28 expression in placode cells starts around stage 14 which is after the  
315 expression of *snai2*, *sox8*, *foxd3* and *twist* and concomitant with that of *sox10*. All of which are  
316 decreased in the absence of MMP28. It should be noted however that other neural crest genes such

317 as *snail* and *sox9* were not affected by MMP28 knockdown. This shows that the neural crest  
318 territory is induced and still identifiable in absence of MMP28 and that MMP28 only affects a  
319 subset of the neural crest gene regulatory network. These data indicate a new level of interaction  
320 between these two cell populations such that the neural crest EMT program is maintained only if  
321 MMP28 is secreted from the placode cells.

322 We found that MMP28 is imported as an active enzyme in the nuclei of neural crest cells.  
323 How is this possible? First of all, more than half of all MMPs have been detected in the nucleus of  
324 at least one cell type (Mannello and Medda, 2012), including MMP28 (Maldonado et al., 2018),  
325 indicating that the ability to traffic to the nucleus is a conserved property of MMPs. Putative nuclear  
326 localization signals have been found in MMP3 and its ability to go from the extracellular space to  
327 the nucleus to participate in transcription has been shown in cell culture (Eguchi et al., 2008).  
328 MMP14 (a.k.a MT1-MMP) can go to the nucleus and contributes to the transcriptional activation  
329 of PI3K in cultured mouse primary macrophages (Shimizu-Hirota et al., 2012). In this study, the  
330 authors showed that the transmembrane domain of MMP14 is needed for nuclear import to occur.  
331 However, a deletion construct lacking both the secretion signal and the transmembrane domain  
332 produced directly in the cytoplasm can still be imported into the nucleus. Further, direct DNA  
333 binding to the promoter of PI3K was demonstrated as well as the ability of MMP14 to activate a  
334 minimal promoter sequence. Unfortunately, the mechanisms and cofactors involved in controlling  
335 entry of MMPs into the cell and their subsequent nuclear import are still unknown and will required  
336 extensive work to be elucidated.

337 MMP28 expression has been described during wound healing (Illman et al., 2008).  
338 Interestingly, its expression is not found in front cells located near the wound but in proliferative  
339 cells located several rows behind the gap that needs to be filled and does not overlap with other

340 proteases (Saarialho-Kere et al., 2002). It would be interesting to assess whether MMP28 acts in a  
341 paracrine manner in this context as well, similarly to what we found in neural crest cells. In cancer,  
342 MMP28 is detected in numerous tumour types. MMP28 promotes cell proliferation in oral  
343 squamous cell carcinoma (Lin et al., 2006) while in gastric cancer (Zhang et al., 2018) and  
344 hepatocellular carcinoma (HCC) (Zhou et al., 2019) there is a clear association with poor prognosis.  
345 In HCC cell lines, MMP28 overexpression promotes EMT via activation of *zeb1* and *zeb2*  
346 downstream of the Notch pathway (Zhou et al., 2019). Given that MMP28 was previously shown  
347 to favour EMT via an extracellular effect on the TGF $\beta$  pathway in lung carcinoma cell lines (Illman  
348 et al., 2006), the authors of the HCC study did not investigate whether MMP28 could act directly  
349 from within the cells.

350 We found MMP28 to be required for normal expression of *sox10*, *twist* and *cad11*. Our  
351 results show that Cad11 and, in particular, Twist are important downstream players since their  
352 forced expression can partially (Cad11) or fully (Twist) compensate for the lack of MMP28. This  
353 is substantiated by the fact that we found MMP28 to be enriched in the proximal promoters of these  
354 genes. The role of Sox10 in this context is less clear. Indeed, previous studies on the role of Sox10  
355 in *Xenopus* NC cells did not find a role in motility but rather showed its importance in lineage  
356 choice (Aoki et al., 2003b; Honore et al., 2003). This suggests that, in addition to its importance  
357 for EMT and migration, MMP28 might be required for other aspects of NC development via the  
358 maintenance of Sox10.

359 In conclusion, our results, in the context of i) the conserved ability of MMPs to traffic to  
360 the nucleus, ii) the few examples of DNA binding previously described, and iii) the frequent  
361 expression of MMPs in cells undergoing EMT, strongly suggest that the role of MMPs as upstream



362 regulators of EMT might be a conserved feature and would need to be systematically assessed in  
363 physiological and pathological situations.

## 364 **References**

- 365 Akkers, R.C., U.G. Jacobi, and G.J. Veenstra. 2012. Chromatin immunoprecipitation analysis of *Xenopus*  
366 embryos. *Methods in molecular biology*. 917:279-292.
- 367 Alfandari, D., H. Cousin, A. Gaultier, B.G. Hoffstrom, and D.W. DeSimone. 2003. Integrin alpha5beta1  
368 supports the migration of *Xenopus* cranial neural crest on fibronectin. *Developmental biology*.  
369 260:449-464.
- 370 Aoki, Y., N. Saint-Germain, M. Gyda, E. Magner-Fink, Y.-H. Lee, C. Credidio, and J.-P. Saint-Jeannet. 2003a.  
371 Sox10 regulates the development of neural crest-derived melanocytes in *Xenopus*.  
372 *Developmental biology*. 259:19-33.
- 373 Aoki, Y., N. Saint-Germain, M. Gyda, E. Magner-Fink, Y.H. Lee, C. Credidio, and J.P. Saint-Jeannet. 2003b.  
374 Sox10 regulates the development of neural crest-derived melanocytes in *Xenopus*.  
375 *Developmental biology*. 259:19-33.
- 376 Bajanca, F., N. Gougnard, C. Colle, M. Parsons, R. Mayor, and E. Theveneau. 2019. In vivo topology  
377 converts competition for cell-matrix adhesion into directional migration. *Nature*  
378 *communications*. 10:1518.
- 379 Bang, A.G., N. Papalopulu, C. Kintner, and M.D. Goulding. 1997. Expression of Pax-3 is initiated in the  
380 early neural plate by posteriorizing signals produced by the organizer and by posterior non-axial  
381 mesoderm. *Development*. 124:2075-2085.
- 382 Becker, S.F., R. Mayor, and J. Kashef. 2013. Cadherin-11 mediates contact inhibition of locomotion during  
383 *Xenopus* neural crest cell migration. *PLoS one*. 8:e85717.
- 384 Bonnans, C., J. Chou, and Z. Werb. 2014. Remodelling the extracellular matrix in development and  
385 disease. *Nature reviews. Molecular cell biology*. 15:786-801.
- 386 Brabletz, T., R. Kalluri, M.A. Nieto, and R.A. Weinberg. 2018. EMT in cancer. *Nature reviews. Cancer*.  
387 18:128-134.
- 388 Culbertson, M.D., Z.R. Lewis, and A.V. Nechiporuk. 2011. Chondrogenic and gliogenic subpopulations of  
389 neural crest play distinct roles during the assembly of epibranchial ganglia. *PLoS one*. 6:e24443.
- 390 David, R., K. Ahrens, D. Wedlich, and G. Schlosser. 2001. *Xenopus* Eya1 demarcates all neurogenic  
391 placodes as well as migrating hypaxial muscle precursors. *Mechanisms of development*. 103:189-  
392 192.
- 393 Devotta, A., H. Juraver-Geslin, J.A. Gonzalez, C.S. Hong, and J.P. Saint-Jeannet. 2016. Sf3b4-depleted  
394 *Xenopus* embryos: A model to study the pathogenesis of craniofacial defects in Nager syndrome.  
395 *Developmental biology*. 415:371-382.
- 396 Eguchi, T., S.K. Calderwood, M. Takigawa, S. Kubota, and K.I. Kozaki. 2017. Intracellular MMP3 Promotes  
397 HSP Gene Expression in Collaboration With Chromobox Proteins. *Journal of cellular biochemistry*.  
398 118:43-51.
- 399 Eguchi, T., S. Kubota, K. Kawata, Y. Mukudai, J. Uehara, T. Ohgawara, S. Ibaragi, A. Sasaki, T. Kuboki, and  
400 M. Takigawa. 2008. Novel transcription-factor-like function of human matrix metalloproteinase 3  
401 regulating the CTGF/CCN2 gene. *Molecular and cellular biology*. 28:2391-2413.
- 402 Escot, S., C. Blavet, S. Hartle, J.L. Duband, and C. Fournier-Thibault. 2013. Misregulation of SDF1-CXCR4  
403 signaling impairs early cardiac neural crest cell migration leading to conotruncal defects.  
404 *Circulation research*. 113:505-516.
- 405 Essex, L.J., R. Mayor, and M.G. Sargent. 1993. Expression of *Xenopus* snail in mesoderm and prospective  
406 neural fold ectoderm. *Developmental dynamics : an official publication of the American*  
407 *Association of Anatomists*. 198:108-122.
- 408 Freter, S., S.J. Fleenor, R. Freter, K.J. Liu, and J. Begbie. 2013. Cranial neural crest cells form corridors  
409 prefiguring sensory neuroblast migration. *Development*. 140:3595-3600.

- 410 Fu, S.C., H.C. Huang, P. Horton, and H.F. Juan. 2013. ValidNESs: a database of validated leucine-rich  
411 nuclear export signals. *Nucleic acids research*. 41:D338-343.
- 412 Garmon, T., M. Wittling, and S. Nie. 2018. MMP14 regulates cranial neural crest epithelial-to-  
413 mesenchymal transition and migration. *Developmental dynamics : an official publication of the*  
414 *American Association of Anatomists*.
- 415 Gentsch, G.E., and J.C. Smith. 2014. Investigating physical chromatin associations across the *Xenopus*  
416 genome by chromatin immunoprecipitation. *Cold Spring Harbor protocols*. 2014.
- 417 Ghanbari, H., H.C. Seo, A. Fjose, and A.W. Brandli. 2001. Molecular cloning and embryonic expression of  
418 *Xenopus* Six homeobox genes. *Mechanisms of development*. 101:271-277.
- 419 Golding, J.P., P. Trainor, R. Krumlauf, and M. Gassmann. 2000. Defects in pathfinding by cranial neural  
420 crest cells in mice lacking the neuregulin receptor ErbB4. *Nature cell biology*. 2:103-109.
- 421 Gougnard, N., C. Andrieu, and E. Theveneau. 2018. Neural crest delamination and migration: Looking  
422 forward to the next 150 years. *Genesis*:e23107.
- 423 Gougnard, N., C. Rouviere, and E. Theveneau. 2021. Using *Xenopus* Neural Crest Explants to Study  
424 Epithelial-Mesenchymal Transition. *Methods in molecular biology*. 2179:257-274.
- 425 Gougnard, N., E. Theveneau, and J.P. Saint-Jeannet. 2020. Dynamic expression of MMP28 during cranial  
426 morphogenesis. *Phil Trans R Soc Lond B Biol Sci. (IN PRESS)*. IN PRESS.
- 427 Hadler-Olsen, E., B. Fadnes, I. Sylte, L. Uhlin-Hansen, and J.O. Winberg. 2011. Regulation of matrix  
428 metalloproteinase activity in health and disease. *The FEBS journal*. 278:28-45.
- 429 Hensey, C., and J. Gautier. 1998. Programmed cell death during *Xenopus* development: a spatio-  
430 temporal analysis. *Developmental biology*. 203:36-48.
- 431 Honore, S.M., M.J. Aybar, and R. Mayor. 2003. Sox10 is required for the early development of the  
432 prospective neural crest in *Xenopus* embryos. *Developmental biology*. 260:79-96.
- 433 Hopwood, N.D., A. Pluck, and J.B. Gurdon. 1989. A *Xenopus* mRNA related to *Drosophila* twist is  
434 expressed in response to induction in the mesoderm and the neural crest. *Cell*. 59:893-903.
- 435 Illman, S.A., K. Lehti, J. Keski-Oja, and J. Lohi. 2006. Epilysin (MMP-28) induces TGF-beta mediated  
436 epithelial to mesenchymal transition in lung carcinoma cells. *Journal of cell science*. 119:3856-  
437 3865.
- 438 Illman, S.A., J. Lohi, and J. Keski-Oja. 2008. Epilysin (MMP-28)--structure, expression and potential  
439 functions. *Experimental dermatology*. 17:897-907.
- 440 Iyer, R.P., N.L. Patterson, G.B. Fields, and M.L. Lindsey. 2012. The history of matrix metalloproteinases:  
441 milestones, myths, and misperceptions. *American journal of physiology. Heart and circulatory*  
442 *physiology*. 303:H919-930.
- 443 Jobin, P.G., G.S. Butler, and C.M. Overall. 2017. New intracellular activities of matrix metalloproteinases  
444 shine in the moonlight. *Biochim Biophys Acta Mol Cell Res*. 1864:2043-2055.
- 445 Jonas, E., T.D. Sargent, and I.B. Dawid. 1985. Epidermal keratin gene expressed in embryos of *Xenopus*  
446 *laevis*. *Proceedings of the National Academy of Sciences of the United States of America*.  
447 82:5413-5417.
- 448 Kerosuo, L., and M. Bronner-Fraser. 2012. What is bad in cancer is good in the embryo: importance of  
449 EMT in neural crest development. *Seminars in cell & developmental biology*. 23:320-332.
- 450 Kosugi, S., M. Hasebe, M. Tomita, and H. Yanagawa. 2009. Systematic identification of cell cycle-  
451 dependent yeast nucleocytoplasmic shuttling proteins by prediction of composite motifs.  
452 *Proceedings of the National Academy of Sciences of the United States of America*. 106:10171-  
453 10176.
- 454 Langhe, R.P., T. Gudzenko, M. Bachmann, S.F. Becker, C. Gonnermann, C. Winter, G. Abbruzzese, D.  
455 Alfandari, M.C. Kratzer, C.M. Franz, and J. Kashef. 2016. Cadherin-11 localizes to focal adhesions  
456 and promotes cell-substrate adhesion. *Nature communications*. 7:10909.

- 457 Le Douarin, N.M., and E. Dupin. 2012. The neural crest in vertebrate evolution. *Current opinion in*  
458 *genetics & development*. 22:381-389.
- 459 Lim, J., and J.P. Thiery. 2012. Epithelial-mesenchymal transitions: insights from development.  
460 *Development*. 139:3471-3486.
- 461 Lin, M.H., S.Y. Liu, H.J. Su, and Y.C. Liu. 2006. Functional role of matrix metalloproteinase-28 in the oral  
462 squamous cell carcinoma. *Oral oncology*. 42:907-913.
- 463 Maldonado, M., A. Salgado-Aguayo, I. Herrera, S. Cabrera, B. Ortiz-Quintero, C.A. Staab-Weijnitz, O.  
464 Eickelberg, R. Ramirez, A.M. Manicone, M. Selman, and A. Pardo. 2018. Upregulation and  
465 Nuclear Location of MMP28 in Alveolar Epithelium of Idiopathic Pulmonary Fibrosis. *American*  
466 *journal of respiratory cell and molecular biology*. 59:77-86.
- 467 Mannello, F., and V. Medda. 2012. Nuclear localization of matrix metalloproteinases. *Prog Histochem*  
468 *Cytochem*. 47:27-58.
- 469 Marchant, D.J., C.L. Bellac, T.J. Moraes, S.J. Wadsworth, A. Dufour, G.S. Butler, L.M. Bilawchuk, R.G.  
470 Hendry, A.G. Robertson, C.T. Cheung, J. Ng, L. Ang, Z. Luo, K. Heilbron, M.J. Norris, W. Duan, T.  
471 Bucyk, A. Karpov, L. Devel, D. Georgiadis, R.G. Hegele, H. Luo, D.J. Granville, V. Dive, B.M.  
472 McManus, and C.M. Overall. 2014. A new transcriptional role for matrix metalloproteinase-12 in  
473 antiviral immunity. *Nature medicine*. 20:493-502.
- 474 Mayor, R., R. Morgan, and M.G. Sargent. 1995. Induction of the prospective neural crest of *Xenopus*.  
475 *Development*. 121:767-777.
- 476 Mayor, R., and E. Theveneau. 2013. The neural crest. *Development*. 140:2247-2251.
- 477 Mizuseki, K., M. Kishi, M. Matsui, S. Nakanishi, and Y. Sasai. 1998. *Xenopus* Zic-related-1 and Sox-2, two  
478 factors induced by chordin, have distinct activities in the initiation of neural induction.  
479 *Development*. 125:579-587.
- 480 Monsoro-Burq, A.H., R.B. Fletcher, and R.M. Harland. 2003. Neural crest induction by paraxial mesoderm  
481 in *Xenopus* embryos requires FGF signals. *Development*. 130:3111-3124.
- 482 Nieto, M.A., R.Y. Huang, R.A. Jackson, and J.P. Thiery. 2016. EMT: 2016. *Cell*. 166:21-45.
- 483 O'Donnell, M., C.S. Hong, X. Huang, R.J. Delnicki, and J.P. Saint-Jeannet. 2006. Functional analysis of Sox8  
484 during neural crest development in *Xenopus*. *Development*. 133:3817-3826.
- 485 Ra, H.J., and W.C. Parks. 2007. Control of matrix metalloproteinase catalytic activity. *Matrix biology :*  
486 *journal of the International Society for Matrix Biology*. 26:587-596.
- 487 Radisky, D.C., D.D. Levy, L.E. Littlepage, H. Liu, C.M. Nelson, J.E. Fata, D. Leake, E.L. Godden, D.G.  
488 Albertson, M.A. Nieto, Z. Werb, and M.J. Bissell. 2005. Rac1b and reactive oxygen species  
489 mediate MMP-3-induced EMT and genomic instability. *Nature*. 436:123-127.
- 490 Rodgers, U.R., L. Kevorkian, A.K. Surridge, J.G. Waters, T.E. Swingler, K. Culley, S. Illman, J. Lohi, A.E.  
491 Parker, and I.M. Clark. 2009. Expression and function of matrix metalloproteinase (MMP)-28.  
492 *Matrix biology : journal of the International Society for Matrix Biology*. 28:263-272.
- 493 Saarialho-Kere, U., E. Kerkela, T. Jahkola, S. Suomela, J. Keski-Oja, and J. Lohi. 2002. Epilysin (MMP-28)  
494 expression is associated with cell proliferation during epithelial repair. *The Journal of*  
495 *investigative dermatology*. 119:14-21.
- 496 Scarpa, E., A. Szabo, A. Bibonne, E. Theveneau, M. Parsons, and R. Mayor. 2015. Cadherin Switch during  
497 EMT in Neural Crest Cells Leads to Contact Inhibition of Locomotion via Repolarization of Forces.  
498 *Developmental cell*. 34:421-434.
- 499 Schlosser, G., and K. Ahrens. 2004. Molecular anatomy of placode development in *Xenopus laevis*.  
500 *Developmental biology*. 271:439-466.
- 501 Shimizu-Hirota, R., W. Xiong, B.T. Baxter, S.L. Kunkel, I. Maillard, X.W. Chen, F. Sabeh, R. Liu, X.Y. Li, and  
502 S.J. Weiss. 2012. MT1-MMP regulates the PI3Kdelta.Mi-2/NuRD-dependent control of  
503 macrophage immune function. *Genes & development*. 26:395-413.

- 504 Spokony, R.F., Y. Aoki, N. Saint-Germain, E. Magner-Fink, and J.P. Saint-Jeannet. 2002. The transcription  
505 factor Sox9 is required for cranial neural crest development in *Xenopus*. *Development*. 129:421-  
506 432.
- 507 Sternlicht, M.D., A. Lochter, C.J. Sympon, B. Huey, J.P. Rougier, J.W. Gray, D. Pinkel, M.J. Bissell, and Z.  
508 Werb. 1999. The stromal proteinase MMP3/stromelysin-1 promotes mammary carcinogenesis.  
509 *Cell*. 98:137-146.
- 510 Szabó, A., E. Theveneau, M. Turan, and R. Mayor. 2019. Neural crest streaming as an emergent property  
511 of tissue interactions during morphogenesis. *PLoS computational biology*. 15:e1007002.
- 512 Taillard, E.D., P. Waelti, and J. Zuber. 2008. Few statistical tests for proportions comparison. *Eur J Oper*  
513 *Res*. 185:1336-1350.
- 514 Theveneau, E., L. Marchant, S. Kuriyama, M. Gull, B. Moepps, M. Parsons, and R. Mayor. 2010. Collective  
515 chemotaxis requires contact-dependent cell polarity. *Developmental cell*. 19:39-53.
- 516 Theveneau, E., and R. Mayor. 2011. Collective cell migration of the cephalic neural crest: the art of  
517 integrating information. *Genesis*. 49:164-176.
- 518 Theveneau, E., and R. Mayor. 2012. Neural crest delamination and migration: from epithelium-to-  
519 mesenchyme transition to collective cell migration. *Developmental biology*. 366:34-54.
- 520 Theveneau, E., B. Steventon, E. Scarpa, S. Garcia, X. Trepas, A. Streit, and R. Mayor. 2013. Chase-and-run  
521 between adjacent cell populations promotes directional collective migration. *Nature cell biology*.  
522 15:763-772.
- 523 Thiery, J.P., and C.T. Lim. 2013. Tumor dissemination: an EMT affair. *Cancer cell*. 23:272-273.
- 524 Yang, J., P. Antin, G. Berx, C. Blanpain, T. Brabletz, M. Bronner, K. Campbell, A. Cano, J. Casanova, G.  
525 Christofori, S. Dedhar, R. Derynck, H.L. Ford, J. Fuxe, A. Garcia de Herreros, G.J. Goodall, A.K.  
526 Hadjantonakis, R.J.Y. Huang, C. Kalchauer, R. Kalluri, Y. Kang, Y. Khew-Goodall, H. Levine, J. Liu,  
527 G.D. Longmore, S.A. Mani, J. Massague, R. Mayor, D. McClay, K.E. Mostov, D.F. Newgreen, M.A.  
528 Nieto, A. Puisieux, R. Runyan, P. Savagner, B. Stanger, M.P. Stemmler, Y. Takahashi, M. Takeichi,  
529 E. Theveneau, J.P. Thiery, E.W. Thompson, R.A. Weinberg, E.D. Williams, J. Xing, B.P. Zhou, G.  
530 Sheng, and E.M.T.I. Association. 2020. Guidelines and definitions for research on epithelial-  
531 mesenchymal transition. *Nature reviews. Molecular cell biology*. 21:341-352.
- 532 Yu, H.H., and C.B. Moens. 2005. Semaphorin signaling guides cranial neural crest cell migration in  
533 zebrafish. *Developmental biology*. 280:373-385.
- 534 Zhang, J., Q. Pan, W. Yan, Y. Wang, X. He, and Z. Zhao. 2018. Overexpression of MMP21 and MMP28 is  
535 associated with gastric cancer progression and poor prognosis. *Oncology letters*. 15:7776-7782.
- 536 Zhou, J., X. Zheng, M. Feng, Z. Mo, Y. Shan, Y. Wang, and J. Jin. 2019. Upregulated MMP28 in  
537 Hepatocellular Carcinoma Promotes Metastasis via Notch3 Signaling and Predicts Unfavorable  
538 Prognosis. *International journal of biological sciences*. 15:812-825.

539

540

541 Figures

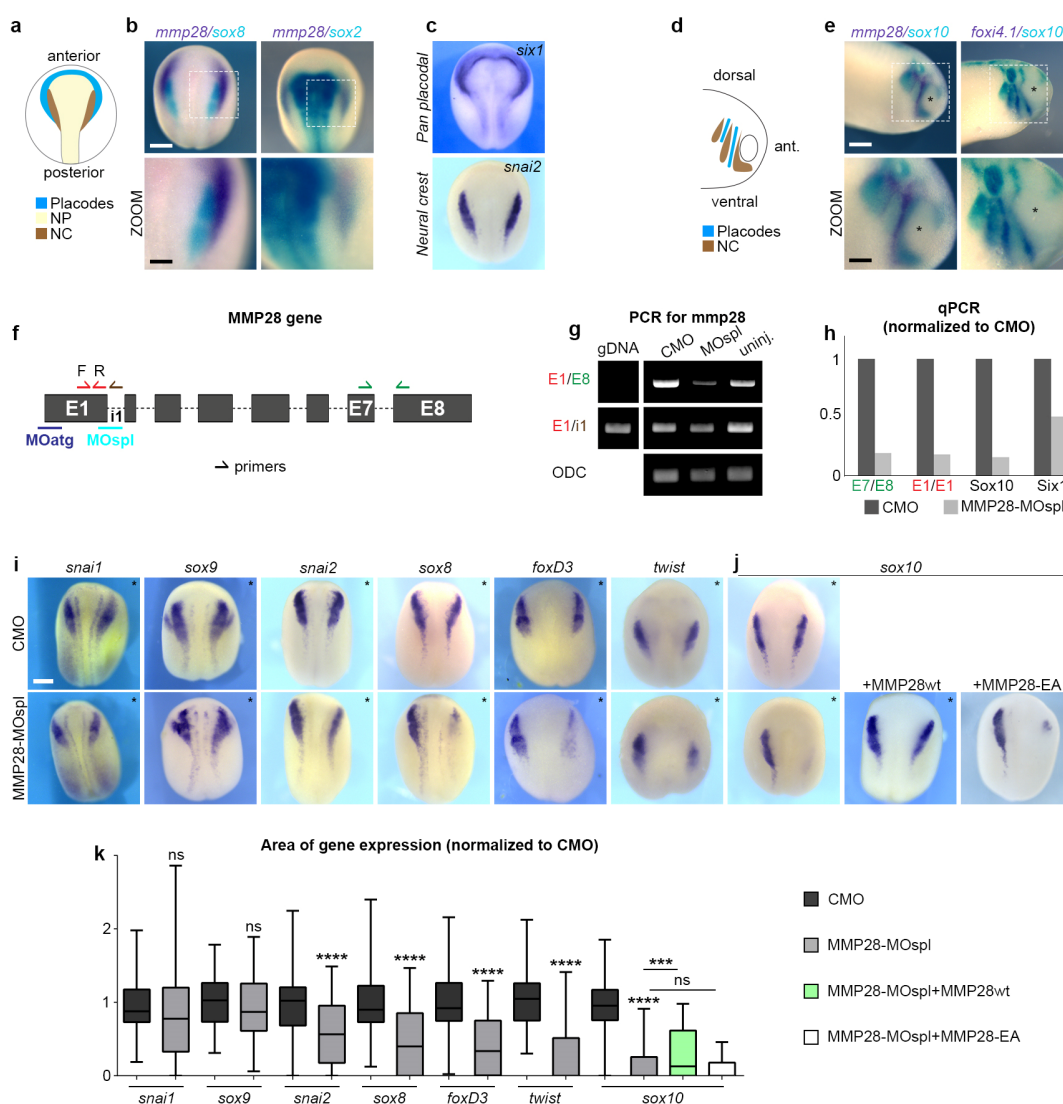

542

543 **Figure 1. MMP28 expressed in placodes is required for normal expression of neural crest genes**

544 **a**, Diagram depicting the distribution of placodes, neural crest (NC) and neural plate (NP) at stage 16. **b-c**, *In situ* hybridization for  
545 *mmp28*, *sox2*, *sox8*, *six1* and *snai2*, as indicated. **d**, Diagram depicting the distribution of placodes and neural crest at stage 25. **e**,  
546 *In situ* hybridization for *mmp28*, *sox10*, and *foxi4.1*, as indicated. **f**, Diagram of *mmp28* gene organization and the relative positions  
547 of MMP28 anti-splicing (MOspl) and translation-blocking Morpholinos (MOatg) used in this study as well as the position of primers  
548 for PCR used to assess MOspl efficiency. **g**, Result of PCR with the various combination of primers shown in **f**. **h**, result of qPCR  
549 with the various combination of primers shown in **f**, normalized to control MO (CMO). Small arrows indicate the position and  
550 orientation of primers. All sequences are in the methods section. **i-j**, Phenotype of embryos (stage 16) injected with control (CMO)  
551 or MMP28 Morpholino (MMP28-MOspI) alone or in combination with wild type (wt) or catalytically dead mutant (EA) MMP28  
552 mRNA and analysed by *in situ* hybridization for *snai1*, *sox9*, *snai2*, *sox8*, *foxd3*, *twist* or *sox10* expression (as indicated). **k**, Area of  
553 expression of neural crest genes normalized to the non-injected side and CMO condition analysed from six independent experiments.  
554 Number of embryos per condition, from left to right: 47, 72; 48, 36; 63, 62; 90, 53; 43, 65, 25, 64; 100, 165, 52, 75. Unpaired t-test  
555 with Welch's correction (CMO vs MMP28-MO) for all genes except *sox10*. For *sox10*, ANOVA followed by multiple comparisons,  
556 ns p > 0.1550, \*(MMP28-MO vs MMP28-MO+wt) p = 0.0292, \*\*\*\*(CMO vs MMP28-MO) p < 0.0001. Scale bar, panels **b**, **c**,  
557 **e** and **i**, 250  $\mu$ m; zooms, 100  $\mu$ m.

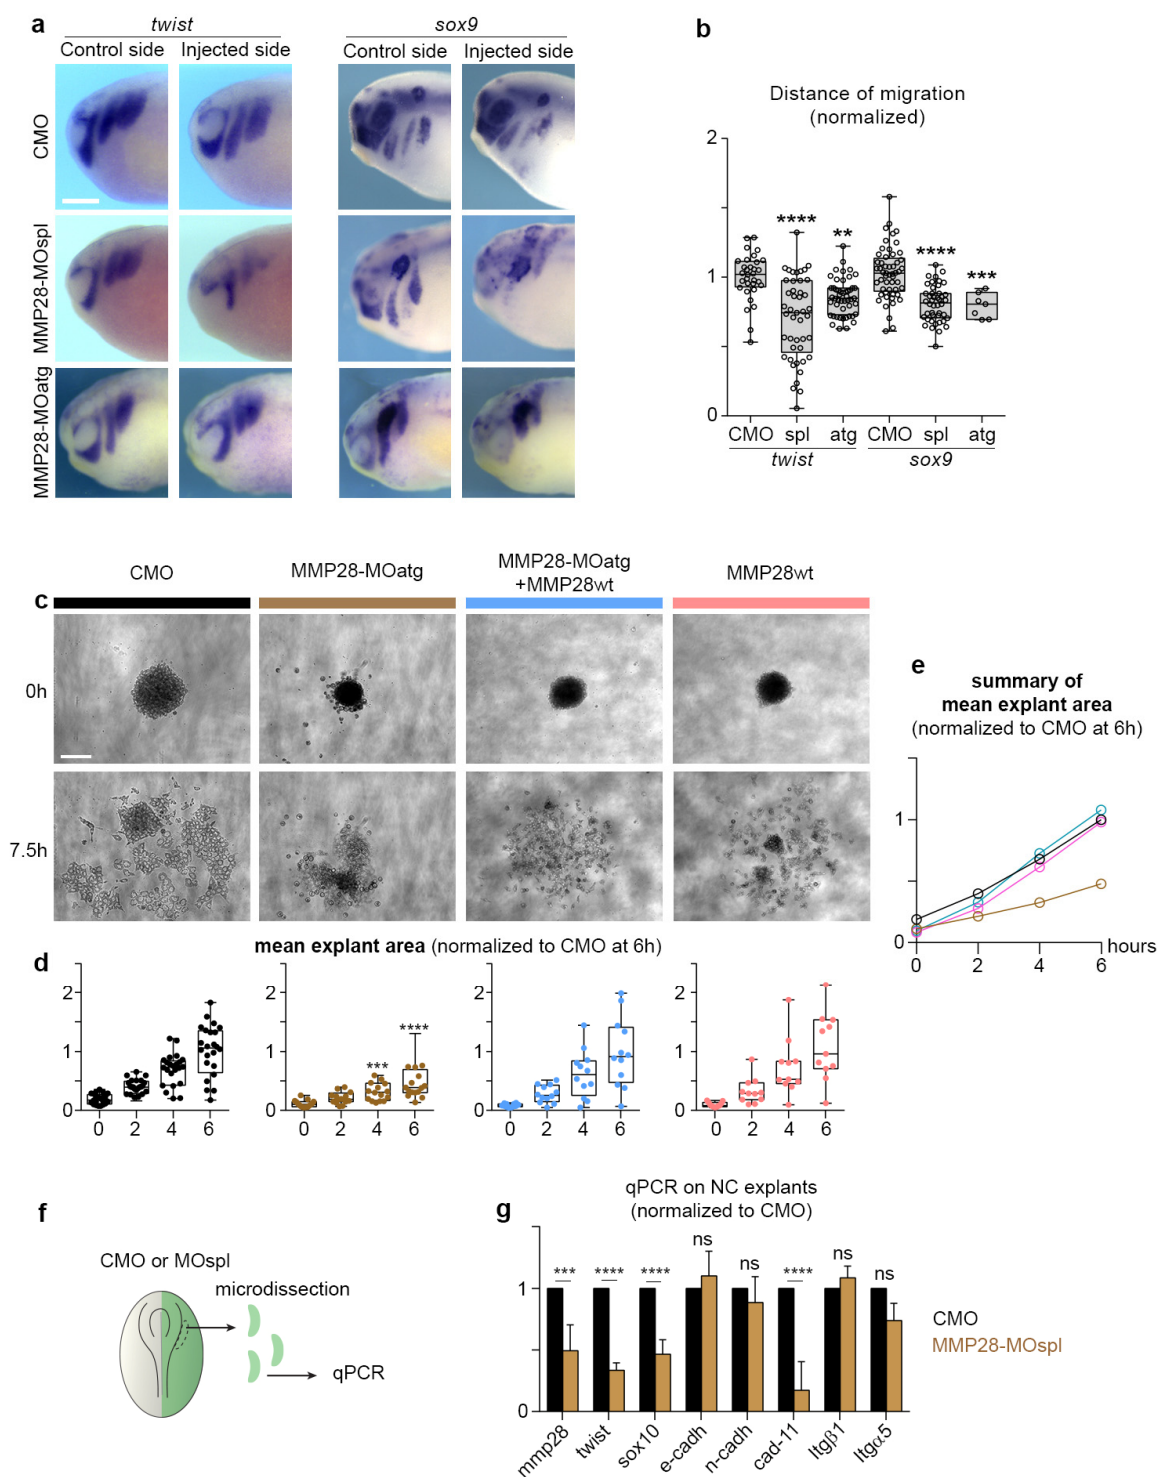

558

559 **Figure 2. MMP28 is required for normal EMT and cell migration**

560 **a**, Phenotype of CMO, MMP28-MOspl and MMP28-MOatg injected embryos (stage 25) analysed  
 561 for *twist* and *sox9* expression, scale bar 250  $\mu$ m. **b**, Graph plotting the distance migrated by NC  
 562 cells in CMO and MMP28-MO embryos. *twist*: nCMO = 32, nMOspl = 45, nMOatg = 49; *sox9*:

563 nCMO = 53, nMOspl = 44, nMOatg=7. ANOVA followed by multiple comparisons, \*\*\*\* p <  
564 0.0001, \*\*\*, p= 0.0005; \*\*, p= 0.0034. **c**, Representative examples of explants at t0 (one hour after  
565 plating on fibronectin) and +7.5h, scale bar 100  $\mu$ m. **d-e**, Distribution of explant areas per hour for  
566 CMO (n = 24), MMP28-MOatg-8ng (n = 16), MOatg-8ng+MMP28wt-1200pg (n = 11),  
567 MMP28wt-1200pg (n = 12). Analysed by two-way ANOVA per time point, \*\*\*, p = 0.0003; \*\*\*\*,  
568 p < 0.0001. **f**, Diagram depicting the procedure prior to quantitative PCR. **g**, Quantitative PCR for  
569 expression of *mmp28*, *sox10*, *twist*, *cadherins E, N* and *11*, *integrin  $\alpha$ 5* and  *$\beta$ 1* subunits, after  
570 injection of MMP28-MOspl or CMO. The values are normalized to *eef1a1* and to the levels of  
571 expression in CMO. From three independent mRNA extractions. Two-Way ANOVA, p values  
572 CMO vs MMP28-MO: *mmp28* = 0.0001 (\*\*\*), *sox10* < 0.0001 (\*\*\*\*), *twist* < 0.0001, *E-cadherin*  
573 0.9498 (ns), *N-cadherin* 0.8943 (ns), *Cadherin-11* < 0.0001 (\*\*\*\*), *Integrin- $\beta$ 1* 0.9813 (ns),  
574 *Integrin- $\alpha$ 5* 0.0915 (ns).  
575



576

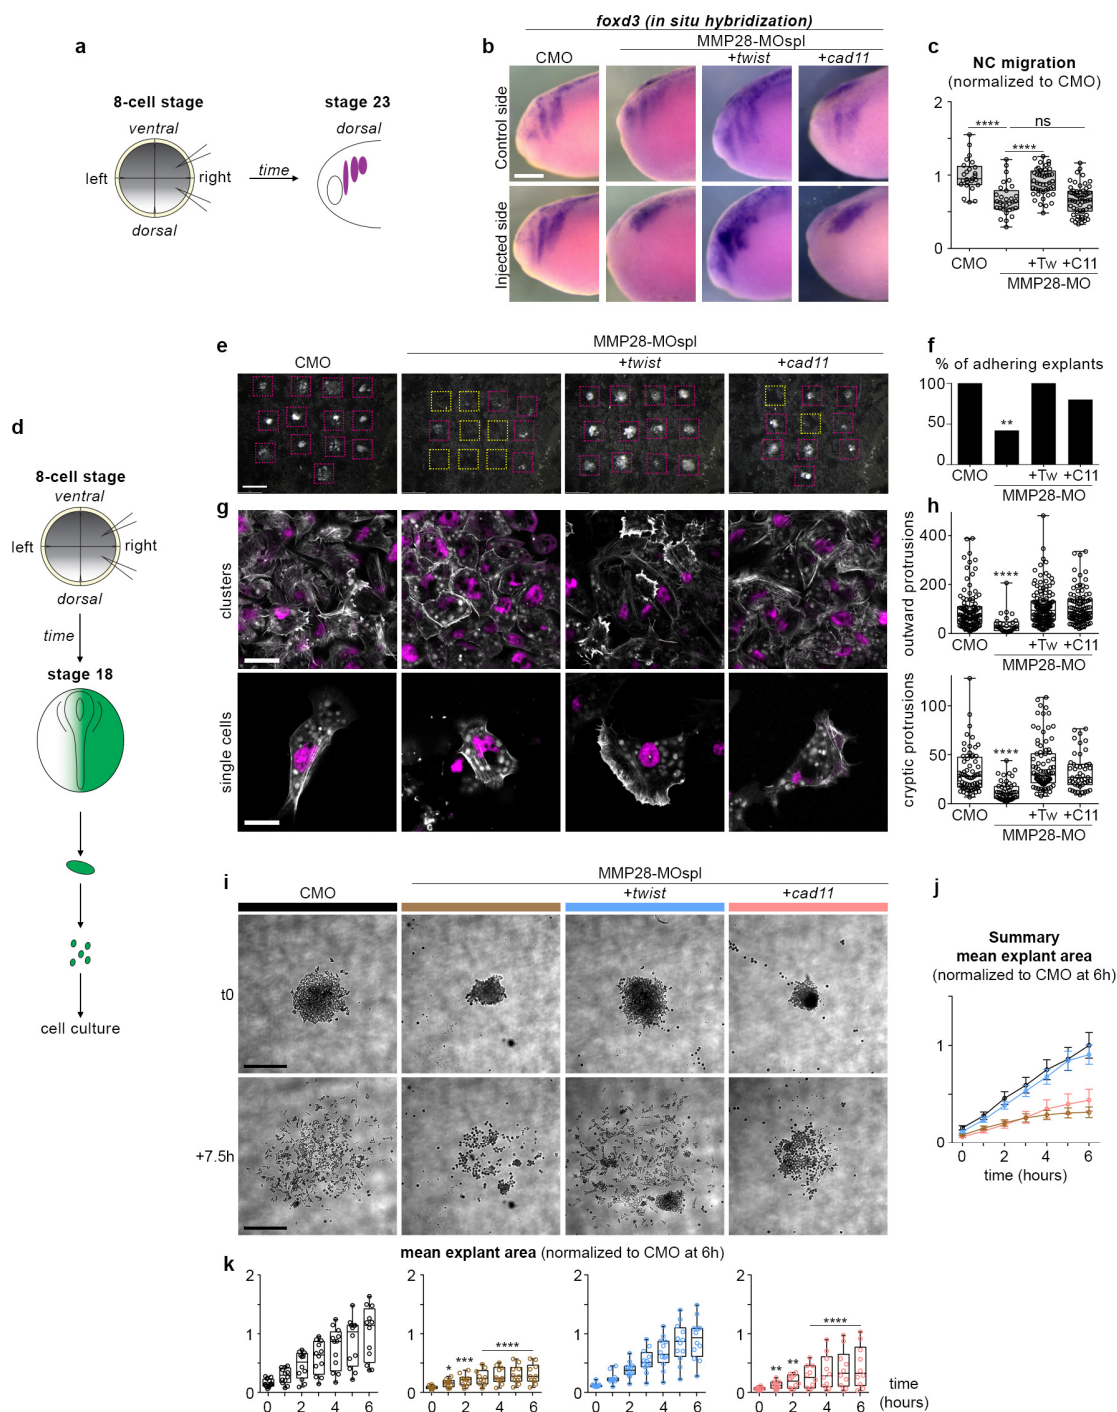

577

578

579 **Figure 3. Twist expression is sufficient to rescue adhesion and migration of neural crest cells**  
580 **after MMP28 knockdown**

581 **a**, Diagram depicting the experimental set-up with injection of MO and mRNA in two blastomeres  
582 on one side of 8-cell stage embryos and the embryos analysed at neural crest migration stage (stage  
583 23). **b**, *In situ* hybridization against *foxd3* following injection with CMO, MMP28-MOspl or the

584 co-injection of MMP28-MOspl together with *twist* or *cadherin-11* mRNA. **c**, Graph plotting the  
585 distance migrated by neural crest cells in the experimental conditions shown in **b**, nCMO = 25,  
586 nMMP28-MOspl = 31 nMMP28-MOspl+*twist* = 57, nMMP28-MOspl+*cad11* = 47 from two  
587 independent experiments. ANOVA followed by uncorrected Fisher's LSD; \*\*\*\*,  $p < 0.0001$ , ns,  
588  $p = 0.8829$ . **d**, Diagram depicting the experimental procedure for neural crest culture on  
589 Fibronectin. **e**, Low magnification images of explants in all experimental conditions after fixation.  
590 Adhering explants are outlined in purple, detached explants are outlined in yellow; scale bar, 500  
591  $\mu\text{m}$ . **f**, Quantification of adhering explants, CMO = 13/13; MMP28-MOspl = 5/13; MMP28-  
592 MOspl+*twist* = 12/12; MO28-MOspl+*cad11* = 8/10. Contingency tables for the comparison of  
593 proportion; CMO vs MMP28-MOspl,  $T=10.53$ , alpha 0.01 (\*\*), MMP28-MOspl vs MMP28-  
594 MOspl+*twist*,  $T=9.88$ , alpha 0.01 (\*\*), MMP28-MOspl vs MMP28-MOspl+*cad11*,  $T=3.31$  (ns),  
595 CMO vs MMP28-MOspl+*cad11*,  $T=2.85$ , (ns). **g**, DAPI (magenta) and Phalloidin (white) staining;  
596 scale bars, 40 $\mu\text{m}$  for clusters, 20 $\mu\text{m}$  for single cells. **h**, Protrusion area in  $\mu\text{m}^2$ , outward protrusions  
597 CMO (n = 64), MMP28-MOspl (n = 49), MOspl+*twist* (n = 47), MOspl+*cad11* (n = 87); cryptic  
598 protrusions CMO (n = 103), MMP28-MOspl (n = 29), MOspl+*twist* (n = 140), MOspl+*Cad11* (n  
599 = 100); ANOVA, Kruskal-Wallis test; \*\*\*\*,  $p < 0.0001$ . **i**, Time-lapse imaging of neural crest  
600 explants, scale bar, 250 $\mu\text{m}$ . **j**, Summary graph with curves showing the mean area and standard  
601 deviation per experimental condition shown in **i** per time point. **j-k**, Mean explant area + s.d. per  
602 explant per conditions shown in **i** per time point, CMO (n = 12), MMP28-MOspl (n = 10),  
603 MOspl+*twist* (n = 12), MOspl+*cad11* (n = 10).

604  
605

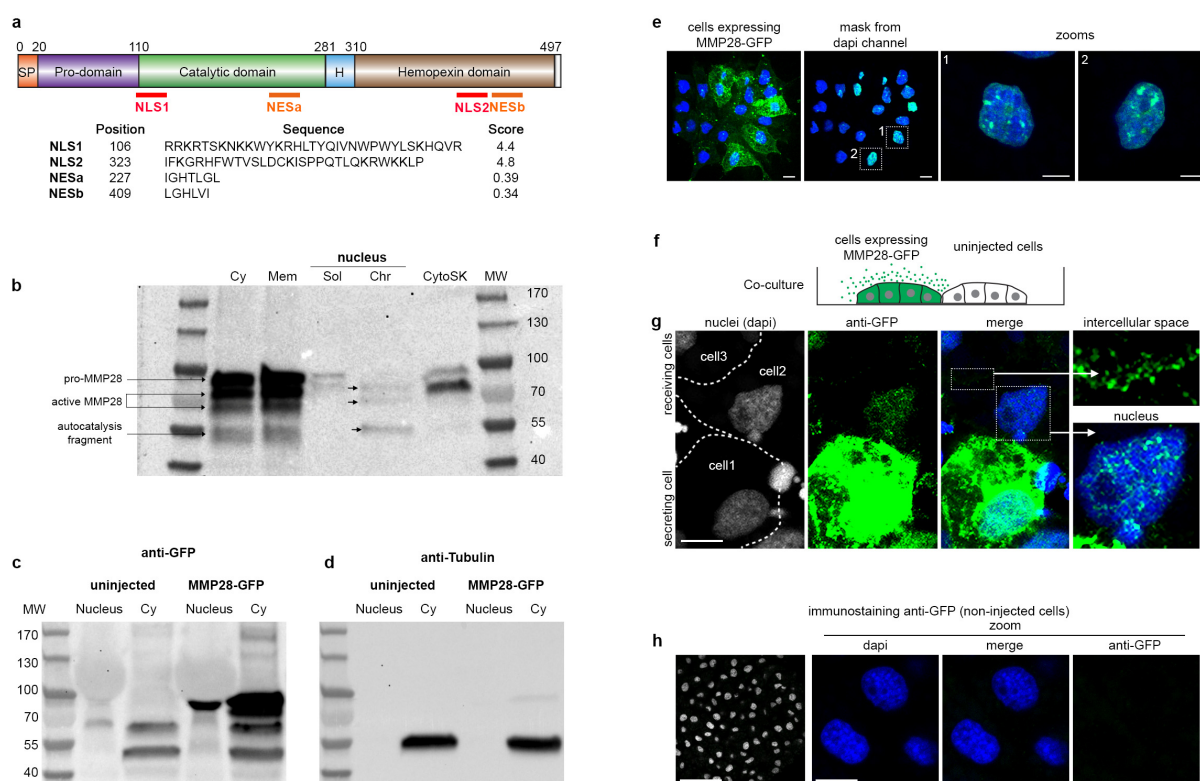

606  
607

608

#### Figure 4. MMP28 can be imported in the nucleus in a paracrine manner

609 **a**, Diagram of MMP28 protein structure and relative position, sequence and score of the putative  
610 NLS and NES signals identified by bioinformatics (see methods). **b**, Western blot against GFP  
611 after cell fractionation from embryos expressing MMP28-GFP; Cy, cytosol; Mem, membrane; Sol,  
612 soluble nuclear fraction; Chr, chromatin-bound nuclear fraction; CytoSK, cytoskeleton fraction;  
613 MW, molecular weight. **c-d**, Western blots against GFP (c) and tubulin (d) on nuclear and cytosolic  
614 fractions. **e**, Neural crest explant expressing MMP28-GFP observed by 3D confocal imaging,  
615 scales bars 10  $\mu$ m. **f**, Diagram depicting the co-culture assay. **g**, Control *Xenopus* neural crest cells  
616 and neural crest cells expressing MMP28-GFP co-cultured on Fibronectin, immunostained with  
617 anti-GFP antibody (green) and counterstained with DAPI (blue), representative images from two  
618 independent experiments with 6 explants, scale bar 10  $\mu$ m. **h**, Immunostaining against GFP on non-  
619 injected cells.

620

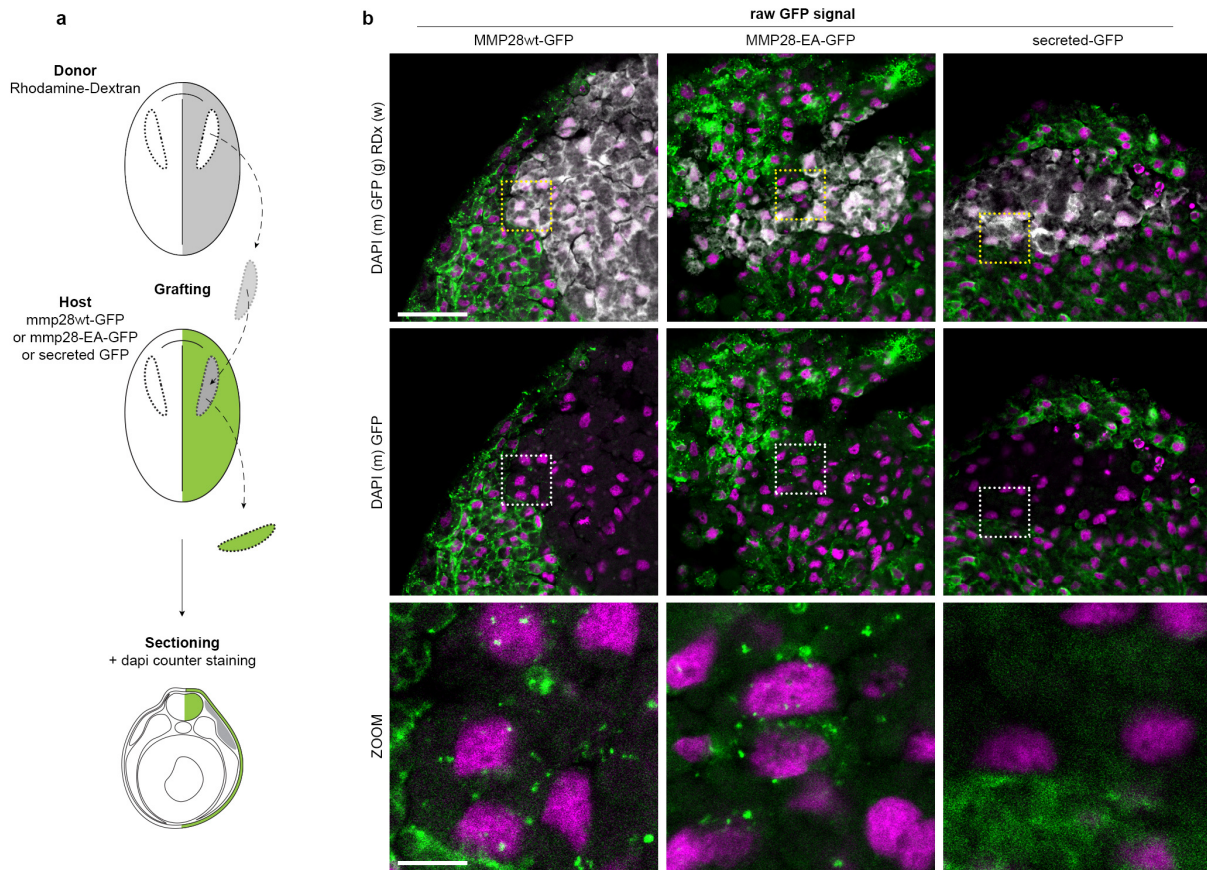

621

622

623

**Figure 5. MMP28 can travel from the ectoderm to the nucleus of neural crest cells *in vivo***

624 **a**, Diagram depicting the grafting procedure and sample preparation. Neural crest from a donor

625 embryo labelled with rhodamine dextran (grey) were grafted into a host embryo expressing

626 MMP28wt-GFP, MMP28-EA-GFP or secreted-GFP in the ectoderm and processed for imaging. **b**,

627 Representative 1  $\mu$ m-thick optical sections through the grafted area by confocal microscopy for

628 each condition (MMP28wt-GFP, n = 4; MMP28-EA-GFP, n = 2; secreted-GFP, n = 4)

629 counterstained with DAPI (magenta), scale bar 100  $\mu$ m. Dash line squares indicate zoomed areas,

630 scale bar for zooms 10  $\mu$ m. No anti-GFP immunostaining was performed on these samples.

631

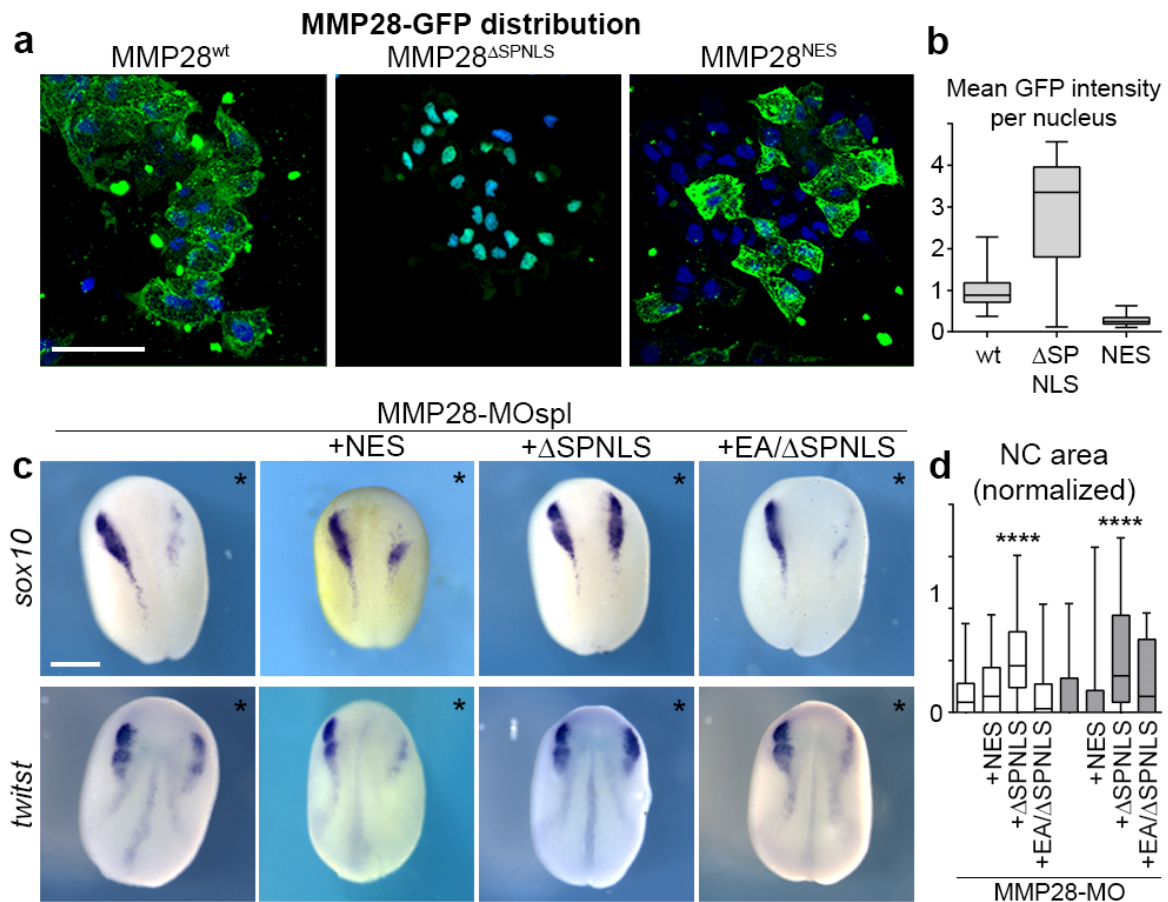

632  
 633  
 634 **Figure 6. Active nuclear MMP28 is required for the expression of *twist***  
 635 **a**, Neural crest expressing GFP-tagged versions of MMP28<sup>wt</sup>, MMP28<sup>ΔSPNLS</sup> and MMP28<sup>NES</sup>  
 636 cultured on fibronectin, scale bar 100 μm. **b**, Mean intensity of the GFP signal per nucleus from  
 637 3D confocal stacks normalized to mean intensity of MMP28-GFP<sup>wt</sup>, WT (n = 85) from three  
 638 explants, ΔSPNLS (n = 39) from two explants, NES (n = 206) from two explants. **c**, Phenotype of  
 639 MMP28-MO injected embryos co-injected with MMP28<sup>NES</sup>-GFP, MMP28<sup>ΔSPNLS</sup>-GFP or  
 640 MMP28<sup>EA/SPNLS</sup>-GFP and analysed for *twist* and *sox10* expression, scale bar 250 μm. Asterisks  
 641 mark injected side. **d**, Area of NC gene expression normalized to non-injected side from 7  
 642 independent experiments. Number of embryos per condition, from left to right: 137, 47, 94, 28, 60,  
 643 49, 70, 18. ANOVA followed by multiple comparisons, \*\*\*\* p < 0.0001.  
 644

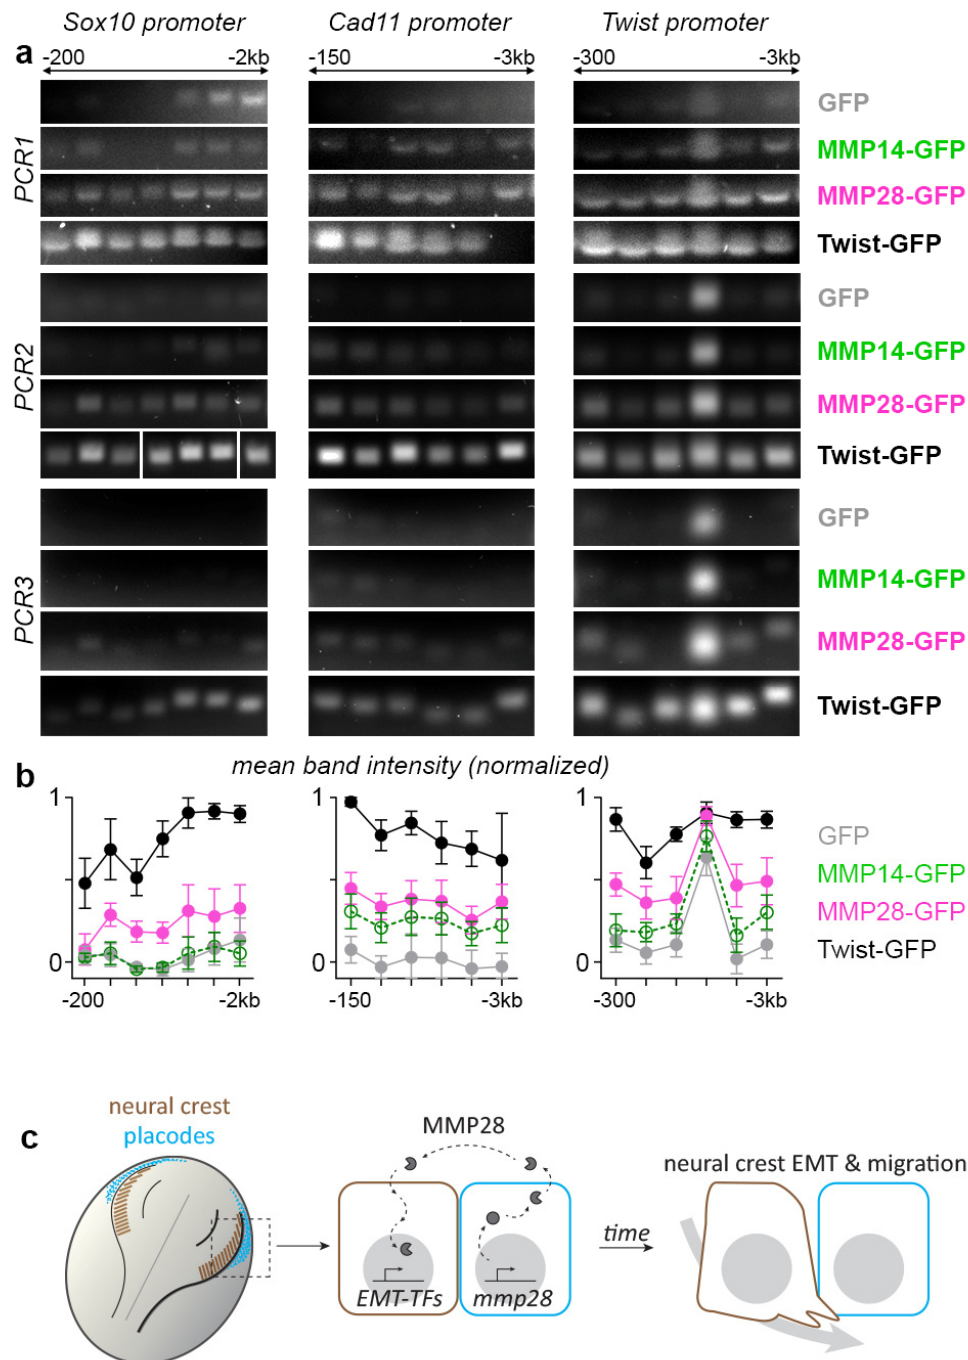

645  
646

647 **Figure 7. MMP28 binds to the proximal promoter of *twist***  
 648 **a**, PCR for regions along the proximal promoters of *sox10*, *cad11* and *twist*, after chromatin-  
 649 immunoprecipitation with GFP, MMP28-GFP and Twist-GFP, three technical replicates are shown  
 650 (PCR1-3). Original uncropped gels are provided in Supplementary Fig. 6. **b**, Mean band intensity  
 651 for each region for the three technical replicates, with standard error of the mean. **c**, Diagram of a  
 652 dorsal view of a *Xenopus* embryo with neural crest in brown and placodes in cyan. MMP28 from  
 653 placodes is imported into neural crest's nuclei to promote EMT.

## 654 **Methods**

655

### 656 ***Xenopus* manipulation and in vitro fertilization**

657 All experiments using *Xenopus laevis* were performed in accordance with the guidelines  
658 of the Guide for the Care and Use of Laboratory Animals of the National Institutes of Health, and  
659 were approved by the Institutional Animal Care and Use Committee of New York University  
660 (animal protocol # IA16-00052) or institutional and national guidelines, under the institutional  
661 licence number A 31 55501 delivered by the Préfecture de la Haute-Garonne. Female *Xenopus*  
662 *laevis* were injected with 750 to 1000 International Units of Chorionic Gonadotrophin (hCG,  
663 Chorulon) and kept overnight at 18°C. Male *Xenopus laevis* were euthanized in 3g/L Tricaine  
664 (Millipore Sigma E10521) and the testis immediately collected and kept in L15 medium  
665 (Millipore Sigma L5520) at 4°C. For fertilization, a suspension of minced testis was added to the  
666 oocytes collected in petri dish in 0.1X Normal Amphibian Medium (NAM): NaCl (110mM), KCl  
667 (2mM), Ca(CO<sub>3</sub>)<sub>2</sub> (1mM), MgSO<sub>4</sub> (1mM), EDTA (0.1mM), NaHCO<sub>3</sub> (1mM), Sodium  
668 Phosphate (2mM).

669

### 670 **Expression vectors and Morpholinos for MMP28**

671 MMP28pCMV-SPORT6 clone was purchased from OpenBiosystems (Horizon  
672 Discovery/Dharmacon, #MXL1736-92024189). MMP28 open reading frame was amplified by  
673 PCR using the following primers, MMP28\_pCS2\_fdw:  
674 ATCGATATGGAAGCTGATATCCATC MMP28\_pCS2+\_rev:  
675 CTCGAGTCAAGTCACATCATTTTTACA, and cloned into a pCS2+ backbone. MMP28<sup>wt</sup>-  
676 GFP was produced from MMP28<sup>wt</sup>-pCS2 by adding a GFP sequence using a PCR strategy with  
677 primers eGFP\_pCS2\_fdw: 5'-AAGGATGCAACTAGGATCCGCTCGATGAGCAAGGGCG-  
678 '3, eGFP\_pCS2\_rev: 5'-CGACTCACTATAGTTCTAGACTTACTTGTA-3' and BamHI/XbaI  
679 cloning. MMP28<sup>ASP/NLS</sup>-GFP-pCS2 was synthesized by Genescript®. MMP28<sup>ASP/wt</sup>-GFP-pCS2  
680 was produced from MMP28<sup>ASP/NLS</sup>-GFP-pCS2 by excision of the NLS sequence (BamHI/XhoI).  
681 MMP28<sup>NES2</sup>-GFP was derived from MMP28<sup>wt</sup>-GFP by insertion in SpeI site of the sequence 5'-  
682 CTGGCCCTGAAGCTGGCCGGCCTGGACATCGGCAGC-3' using oligo annealing  
683 procedure. The catalytically dead mutants MMP28<sup>EA</sup>-pCS2 and MMP28<sup>EA-ASP/NLS</sup>-GFP-pCS2  
684 were produced by point mutation of Glutamic acid<sup>226</sup> to Alanine from MMP28<sup>wt</sup>pCS2 and  
685 Glutamic acid<sup>209</sup> to Alanine from MMP28<sup>ASP/NLS</sup>-GFP-pCS2 using QuikChange II site-Directed  
686 Mutagenesis Kit (Agilent #200523) with the primers MMP28\_E-A\_fdw: 5'-  
687 ACTGGCACATGCGATTGGACAT-3' and MMP28\_E-A\_rev: 5'-  
688 ATGTCCAATCGCATGTGCCAGT-3'.

689 For the secreted GFP constructs, we inserted the signal peptide of MMP28 into the construct  
690 eGFPpCS2 in NcoI restriction sites using the Plasmid Modification by Annealed Oligo Cloning  
691 method from addgene (<https://www.addgene.org/protocols/annealed-oligo-cloning/>) with the  
692 following primers:

693 5'-CATGGAAGCTGCTATTCCATCCCTGTTCTTTCTGCTTGTGATTGCTGGTTTGTG  
694 CTTGC-3' and 5'CATGGAAGCACAAACCAGCAATCACAAGCAGAAAGAACAGGGATG  
695 GAATAGCAGCTTC-3'

696 Morpholino antisense oligonucleotides were purchased from Gene-Tools (Pilomath, OR):

697 MMP28-MO<sub>spl</sub>: 5'-GTATGCCTCTGATATTTACCTGTGC-3', MMP28-MO<sub>atg</sub>: 5'-  
698 TGTTTAATGGATGAGTAACTTATCT-3' and Control MO (CMO): 5'-  
699 CCTTTACCTCAGTTACAATTTATA-3'.

700  
701  
702  
703  
704  
705  
706  
707  
708  
709  
710  
711  
712  
713  
714  
715  
716  
717  
718  
719  
720  
721  
722  
723  
724  
725  
726  
727  
728  
729  
730  
731  
732  
733  
734  
735  
736  
737  
738  
739  
740  
741  
742  
743  
744  
745  
746

## Microinjections

mRNAs were synthesized *in vitro* from the various pCS2 constructs using the Ambion Message Machine kit (Austin, TX). MMP28<sup>wt</sup> and MMP28<sup>EA</sup> mRNAs were injected at 8-cell stage in two animal blastomeres with 600 pg/bl, while all MMP28-GFP mRNAs were injected at 900 pg/bl to respect equimolarity. CMO and MMP28-MO (atg and spl) were injected at 4ng per blastomere either alone or in combination with MMP28 mRNAs at 8 cell stage, in 2 animal blastomeres for *in situ* hybridization (ISH), neural crest extraction and grafting, or 4 animal blastomeres for PCR and qPCR. Nuclear mCherry (Theveneau et al., 2013) was injected at 10 pg per blastomere. *Twist* and *cadherin-11* mRNA were injected at 125 pg per blastomere.

## TUNEL assay

TUNEL staining was carried out as described (Hensey and Gautier, 1998). Morpholinos-injected albinos embryos fixed in MEMFA were rehydrated in PBT and washed in TdT buffer (Invotrogen) for 30 min. End labeling was carried out overnight at room temperature in TdT buffer containing 0.5 μM DIG-dUTP and 150 U/ml TdT (Invitrogen). Embryos were then washed for 2 hours at 65°C in PBS/1 mM EDTA. DIG was detected with anti-DIG Fab fragments conjugated to alkaline phosphatase (Roche, Indianapolis IN; 1:2000), and the chromogenic reaction performed using BM purple (Roche, Indianapolis). Injection of a Morpholino against *Sf3b4* was used as a positive control for induction of cell death (Devotta et al., 2016). For each MO, a subset of injected embryos injected was processed for *in situ* hybridization against *sox10* as internal control for the effect of the MOs. TUNEL dots were counted in the neural crest region on each side. The neural crest region was defined as the lateral part of the anterior neural fold. Differences between injected and uninjected sides were plotted as well as the frequency distribution of TUNEL dots on the injected side for each condition.

## In situ hybridization

Embryos were fixed overnight at 4°C in MEMFA and dehydrated by several washes in methanol. Embryos were then rehydrated by solutions of decreasing methanol concentration, washed in PBS and bleached in hydrogen peroxide (10%) to attenuate the ectoderm pigmentation. After bleaching, a short post-fixation in formaldehyde 3.7% was performed. Embryos were then processed using the InsituPro VS (Intavis AG Bioanalytical Instruments, Germany) automate. Briefly, embryos were incubated 16 hours at 65°C in formamide-based hybridization buffer containing a digoxigenin or Fluorescein-12-labelled antisense probe against the gene of interest. Probes were washed in formamide-based washing solutions, then washed in PBS plus 0.1% tween, and sequentially incubated for 1 hour in a serum-based blocking solution and then for 1 hour in blocking solution containing the anti-digoxigenin (Roche, 11093274910; 1/2000) or anti-Fluorescein (Roche, 11426346910; 1/10000) antibody coupled with alkaline phosphatase. Staining was performed by incubating embryos in staining buffer (pH9.5) containing NBT (Promega, S380C) at 50μg/mL and BCIP (Promega, S381C) at 100 μg/mL or Magenta-Phos (Biosynth, B-7452). The following probes were used: *XL-snai2* (Mayor et al., 1995), *XL-twist1* (Hopwood et al., 1989), *XL-MMP28* (Gougnard et al., 2020), *XL-foxD3* (Monsoro-Burq et al., 2003), *XL-snai1* (Essex et al., 1993), *XL-sox8* (O'Donnell et al., 2006), *XL-sox9* (Spokony et al., 2002), *XL-sox10* (Aoki et al., 2003a), *XL-eya1* (David et al., 2001), *XL-six1* (Ghanbari et al., 2001), *XL-foxi4.1* (Schlosser and Ahrens, 2004), *XL-sox2* (Mizuseki et al., 1998), *XL-keratin* (Jonas et al., 1985) and *XL-pax3* (Bang et al., 1997).



## 747 **Ex-vivo neural crest culture**

748 NC cultures were performed as described elsewhere (Gouignard et al., 2021). Briefly,  
749 neural crest explants were isolated from stage 18 embryos using a hair knife (hair mounted on a  
750 glass pipette) and plated on fibronectin-coated Ibidi  $\mu$ slides dishes (Ibidi, ref 80821). Dishes were  
751 prepared by incubating fibronectin solution at 10  $\mu$ g/mL for one hour at 37°C.

## 753 **Grafts of neural crest cells**

754 Grafts were performed as described elsewhere (Bajanca et al., 2019). Embryos at stage 18  
755 were immobilized into a Petri dish filled with modelling clay. The pigmented ectoderm layer  
756 located above the neural crest region was carefully removed. Neural crest cells were  
757 mechanically detached from their surrounding tissues by applying gentle pressure on the side of  
758 the neural crest domain in a lateral to medial direction. To perform the graft, a given neural crest  
759 explant was first dissected out from a host embryo, then a neural crest explant was harvested  
760 from the donor embryo and grafted into the wound of the host and kept in place by a piece of  
761 glass coverslip for 15 min. The coverslip was then removed and embryos allowed to heal.

## 763 **Immunostaining on cell cultures**

764 *Xenopus* NC cells were cultured on fibronectin-coated dishes and were allowed to migrate  
765 for a few hours, fixed in 4% PFA for 30 minutes, blocked and permeabilized (PBS1X, 2% serum  
766 and 0.1% Triton) for 30 minutes and incubated 2 hours at room temperature or overnight at 4°C  
767 with a primary antibody. After several washes in PBS, they were incubated 1 hour at room  
768 temperature or overnight at 4°C with a secondary antibody mixed with DAPI and/or Phalloidin,  
769 and analysed on a Zeiss 710 inverted confocal microscope. Primary antibodies: Rabbit anti-GFP  
770 (Torrey Pines BioLabs, TP-401; 1:200), Rabbit anti-Flag (MilliporeSigma, F1804; 1:200).  
771 Secondary antibodies: goat anti-rabbit Alexa-488 or 555 (ThermoFisher Scientific).

## 773 **qPCR and PCR**

774 Total RNAs from neural crest explants from injected embryos were extracted with  
775 RNeasy® Micro Kit (Qiagen) and used for relative quantitative PCR (QuantStudio 3 real Time  
776 PCR system; ThermoFisher scientific) using Power SYBR™ Green RNA-to-Ct 1-Step Kit  
777 according to the manufacturer instructions. The following primers set were used:

778 Cadherin-11\_rev: 5'-CATCCTCTGGGTTGATGCTG 3',  
779 Cadherin-11\_fwd: 5'-TCGGATACTGTGGTTCGGAAG-3',  
780 N-cadherin\_rev: 5'-ATTGTAACGGAGACGGTTGC-3',  
781 N-cadherin\_fwd: 5'-CAGCAACGATGGCTTAGTGA-3',  
782 XB-cadherin\_fwd: 5'-TATCCTTGCTGCTGCTCCTG-3',  
783 XB-cadherin\_rev: 5'-TCACCTCCACCTTCCTCTCC-3',  
784 E-cadherin\_rev: GCACAGAGCCTTCAAAGACC-3',  
785 E-cadherin\_fwd: 5'-CGACCTTTGGACAGAGAAGC-3',  
786 EeF1a1\_rev: 5'-CACGGGTTTGTCCATTCTTT-3',  
787 EeF1a1\_fwd: 5'-ATTGATGCTCCAGGACACAG-3',  
788 Twist1qPCR\_fwd: 5'-CGACTTTCTCTGCCAGGTCT-3',  
789 Twist1qPCR\_rev: 5'-TCCACACGGAGAAGGCATAG-3',  
790 MMP28-E7\_fwd: 5'-TGCAGTGGTATCGGGTTTAG-3',  
791 MMP28-E8\_rev: 5'-AAAGTGCAGTGTGACGACGA-3',  
792 Sox10\_fwd: 5'-CTGTGAACACAGCATGCAAA-3'  
793 Sox10\_rev: 5'-TGGCCAACTGACCATGTAAA-3',

794 MMP28-E1\_fwd: 5'-GGAAGCTGCTATTCCATCCCTGT-3',  
795 MMP28-E1\_rev: 5'-ACCTGTGCAGTTTGTAGGGTCT-3',  
796 Six1\_fwd: 5'-CTGGAGAGCCACCAGTTCTC-3',  
797 Six1\_rev: 5'-AGTGGTCTCCCCCTCAGTTT-3'.  
798 All pair of primers were validated using the standard curve method, and the data were normalized  
799 to *eef1 $\alpha$* .

800 For Morpholino validation by RT-PCR, total RNAs from injected embryos were extracted  
801 with RNeasy® Micro Kit (Qiagen) and reverse-transcribed using SuperScript™ IV VILO™  
802 Master Mix (ThermoFisher Scientific, #11756050) according to the manufacturer instructions,  
803 and used for PCR with Illustra™ PuReTaq Ready-To-Go™ PCR beads. The following primer  
804 sets were used:

805 ODC\_fwd: 5'-ACATGGCATTCTCCCTGAAG-3',  
806 ODC\_rev: 5'-TGGTCCCAAGGCTAAAGTTG-3',  
807 MMP28-E1b\_fwd: 5'-GAAGAGACCCTACAAACTGC-3',  
808 MMP28-E8\_rev: 5'-AAAGTGCAGTGTCCAGGACGA-3',  
809 MMP28-I1-rev: 5'-GACAACGCATTTCCCAAAC-3',  
810

### 811 Chromatin immunoprecipitation (ChIP)

812 For chromatin immunoprecipitation (ChIP), we followed standard procedures established  
813 for *X. laevis* embryos (Akkers et al., 2012; Gentsch and Smith, 2014). For each independent  
814 experiment we used two technical replicas and 250–300 *Xenopus* embryos per condition. Briefly,  
815 stage 18 *X. laevis* embryos were fixed for 30 min at room temperature and sonicated for 12  
816 minutes at 60% power (30 seconds On 30 seconds Off) in a QSonica Q800R3 sonicator. Then, 2  
817  $\mu$ g of Anti-GFP ChIP grade antibody (Abcam, ab290) were used to precipitate a fraction of the  
818 total sonicated extract that was equivalent to 12 embryos. For DNA extraction we followed a  
819 standard protocol (Akkers et al., 2012; Gentsch and Smith, 2014). Using the Xenbase genome  
820 browser resource, we searched for putative chromatin accessible regions in a region spanning  
821 about 3kb of the putative proximal promoter of *sox10*, *cadherin-11* and *twist1* genes. Primer pairs  
822 were designed to analyze chromatin enrichment by PCR. Primers positions and sequences are  
823 listed below. PCR was performed using the following conditions 98 °C for 10 s, 64 °C for 20 s,  
824 and 72 °C for 10 s for 35 cycles.

825  
826 *sox10*\_F1: 5'-GCAATGTACCGGCTGCAATA-3'; -451  
827 *sox10*\_R1: 5'-CGTCGCACAGTGCTTCTTT-3'; -269  
828 *sox10*\_F2: 5'-CTGCAACTCTCCAGCTCTTT-3'; -734  
829 *sox10*\_R2: 5'-GCAGTCTGTGTTAATGCAAGTC-3'; -526  
830 *sox10*\_F3: 5'-AATCTAGGAAAGTACGTCAGTGC-3'; -754  
831 *sox10*\_R3: 5'-CCACCCTCCTGGACTAATAAATG-3'; -536  
832 *sox10*\_F4: 5'-TAAACTACAGCACCCAGCATC-3'; -776  
833 *sox10*\_R4: 5'-CTGTTCTAGTGCAGTCTGTGTT-3'; -583  
834 *sox10*\_F5: 5'-CGCATTGGCTTGTAGTGAATATG-3'; -1322  
835 *sox10*\_R5: 5'-GTTCTCTGTCCAATGCTAACT-3'; -1092  
836 *sox10*\_F6: 5'-AAAGTGTTGTGTAGCCGTAGAT-3'; -1358  
837 *sox10*\_R6: 5'-CTCAATGGTAGAGGCTAATGAGAG-3'; -1151  
838 *sox10*\_F7: 5'-AGCCGTAGATTAACAAGAGGTG-3'; -1370  
839 *sox10*\_R7: 5'-AGAGGCTAATGAGAGTGCATTT-3'; -1142

840  
841 cad11\_F1: 5'-TCCAGTCTCTGCATCACTTTATC-3'; -284  
842 cad11\_R1: 5'-GGGTCTCTCAGCTTCTCTTTC-3'; -136  
843 cad11\_F2: 5'-TCCCACACACACACATCTTATC-3'; -444  
844 cad11\_R2: 5'-ATGGAAGCATATGGAGGAAAGG-3'; -310  
845 cad11\_F3: 5'-CCCAGACCAATAGAACCACTTT-3'; -1057  
846 cad11\_R3: 5'-GAGGGTGTTAATTGGCCCTAA-3'; -929  
847 cad11\_F4: 5'-AGCTGGGACACTTTGGTAAAT-3'; -1212  
848 cad11\_R4: 5'-TCCTTCTGCCTTGGCTTTC-3'; -1112  
849 cad11\_F5: 5'-ATGGCAAAGGTCCACTCAA-3'; -2730  
850 cad11\_R5: 5'-GACTCGTATCACTAACAGCCTATC-3'; -2635  
851 cad11\_F6: 5'-TAGAAGAAGCTGGGCATGTG-3'; -2893  
852 cad11\_R6: 5'-CCCTGTACCCACTCAAATAAG-3'2753  
853  
854 twist1\_F1: 5'-ACAATCCGCGCTAAGTAAAGA-3'; -600  
855 twist1\_R1: 5'-GGATCCTATGGGAATGGGAAAG-3'; -481  
856 twist1\_F2: 5'-GGACCCAGTCTAAGGGAATAGA-3'; -1189  
857 twist1\_R2: 5'-TCAGCCACCCTTCACATTTAG-3'; -1109  
858 twist1\_F3: 5'-GGCTGGTACAGAAGCTCAA-3'; -1506  
859 twist1\_R3: 5'-CCAGGACAGGCATGTGTATAG-3'; -1408  
860 twist1\_F4: 5'-GGGTGCCTTACAGAGCATT-3'; -2169  
861 twist1\_R4: 5'-TTCTGACCCTTCCAGCTTTC-3'; -2088  
862 twist1\_F5: 5'-CAGCTTCTATTAGCACCGGATTA-3'; -2536  
863 twist1\_R5: 5'-CCTTTAAGACCAAGGACTGAGG-3'; -2424  
864 twist1\_F6: 5'-GCACTGAGCTGGAGCTTTAT-3'; -2985  
865 twist1\_R6: 5'-CACAGGCACCAAGTGTGTAT-3'; -2838

866  
867 Band intensities were measured using FIJI. For each band the level of background signal was  
868 measured in a portion of the gel directly adjacent to the band and subtracted. Each dataset was  
869 then normalized to the peak value.

870

## 871 **Statistics**

872 Comparison of percentages was performed using contingency tables (Taillard et al.,  
873 2008). Two data sets were considered significantly different (null hypothesis rejected) if  $T >$   
874  $3.841$  ( $\alpha = 0.05$ , \*),  $T > 6.635$  ( $\alpha = 0.01$ , \*\*) or  $T > 10.83$  ( $\alpha = 0.001$ , \*\*\*). Normality of data  
875 sets was tested using Kolmogorov-Smirnov's test, d'Agostino and Pearson's test and Shapiro-  
876 Wilk's test using Prism6 (GraphPad). A data set was considered normal if found as normal by all  
877 three tests. Datasets following a normal distribution were compared with Student T-test (two-  
878 tailed, unequal variances) or a one-way ANOVA with multiple comparisons post-test in Prism6  
879 (GraphPad). Datasets that did not follow a normal distribution were compared using Mann  
880 Whitney's test or a non-parametric ANOVA using Prism6 (GraphPad). Cross-comparisons were  
881 performed only if overall P value of the ANOVA was  $< 0.05$ . Strategy for sample size  
882 determination does not apply here since all embryos or cells available were analysed. Statistics  
883 were performed on the whole population. Variances were not assumed to be equal. Box and  
884 whiskers plot: the box extends from the 25th to the 75th percentile; the whiskers show the extent  
885 of the whole dataset. The median is plotted as a line inside the box. Statistics are provided in  
886 figure legends or added directly onto the graphs. All error bars on graphs and curves that are not

887 box and whiskers plots correspond to the standard deviation (s.d) or standard error of the mean  
888 (s.e.m) as indicated in the figure legends.

889

### 890 **Image analysis**

891 The net distance of *in vivo* NC cells migration was measured using FIJI/Image J by  
892 drawing a straight line between the dorsal midline and the ventral-most NC cells of each stream.  
893 The mean length of dorsoventral extension is calculated per embryo and each side (experimental  
894 vs control/non-injected). The ratio of the mean dorsoventral extension is plotted after  
895 normalization to the control condition of reference.

896 Neural crest areas at pre-migratory stages were measured as follows: ISH images were  
897 converted to 32-bit black and white (NBT/BCIP magenta staining being white on a black  
898 background), thresholded with background converted to NaN, automatic measurements of area  
899 were made with batch processing in FIJI/imageJ. If an embryo had too much background after  
900 ISH, the size of the NC area was retrieved by hand in FIJI/ImageJ using the polygon tool.

901 Analysis of nuclear localization of the various MMP28-GFP constructs was performed  
902 from 3D confocal stacks with optimal pinhole settings acquired after immunostaining against  
903 GFP and counterstaining with DAPI. In Imaris (Bitplane), the DAPI channel was used as a mask  
904 to sample the GFP channel. Then, surface analysis was performed to calculate the volume of the  
905 nuclei and the volume of the GFP within the nuclei. Nuclear localization is expressed as a ratio  
906 between the volume of nuclear GFP immunostaining and the nuclear volume.

907

### 908 **Bioinformatics analysis of *Xenopus* MMP28 protein sequence**

909 *Xenopus laevis* MMP28 amino acid sequence was searched for putative importin  $\alpha$ -  
910 dependent nuclear localization signals and nuclear export signals using cNLS mapper (Kosugi et  
911 al., 2009) ([http://nls-mapper.iab.keio.ac.jp/cgi-bin/NLS\\_Mapper\\_form.cgi](http://nls-mapper.iab.keio.ac.jp/cgi-bin/NLS_Mapper_form.cgi)) and ValidNESs (Fu et  
912 al., 2013) (<http://validness.ym.edu.tw/>).

913

### 914 **Western Blots**

915 Cell fractions of fifty (100 mg) stage 17 wild-type or injected embryos were obtained  
916 using the Subcellular Protein Fractionation Kit for Tissues (ThermoFisher Scientific # 87790).  
917 Protein quantification was performed using Bradford technique (Pierce). Around 40  $\mu$ g of  
918 proteins were loaded per lane of a 4-12% precast gel (Bio-Rad Mini-PROTEAN<sup>®</sup>). Proteins were  
919 transferred on PVDF-membrane and blocked for 1h with 5% skimmed milk. The following  
920 antibodies were used: anti-GFP 1:1000 (Torrey Pines BioLabs; TP-401), anti-Tubulin 1:1000  
921 (Sigma, T9026), anti-rabbit-HRP or anti-mouse-HRP 1:10000 (Millipore).

922

### 923 **Acknowledgements**

924 The authors are grateful to Profs. Marianne Bronner (CalTech) and A-H Monsoro-Burq (Institut  
925 Curie, College de France) as well as Drs Bertrand Benazeraf (CNRS, University of Toulouse),  
926 Kyra Campbell (Sheffield University), Guojun Sheng (Kumamoto University), Sei Kuriyama  
927 (Akita University), Ben Steventon (Cambridge University) for critical reading of the manuscript  
928 and friendly advice. E.T. acknowledges support from the French National Center for Scientific  
929 Research (CNRS), the Fondation pour le Recherche Medicale (FRM AJE201224), the Midi-  
930 Pyrenees Regional Council (13053025), Toulouse Cancer Sante (DynaMeca) and Universite Paul  
931 Sabatier. N.G was supported by grants from the Fondation pour le Recherche Medicale  
932 (ARF20150934153), the European Marie Curie Prestiges Program (PRESTIGES 2015-4-007), a  
933 grant from the National Institutes of Health (R21 DE029333) and a pilot grant from the NYU

934 Center for Skeletal and Craniofacial Biology which was established by NIH (1P30DE020754). J-  
935 P. S-J. acknowledges support from a grant from the National Institutes of Health (R01DE25806).  
936 EHB lab receives funding from the European Research Council (ERC) under the European  
937 Union's Horizon 2020 research and innovation programme (grant agreement No. 950254)"  
938 "EMBO IG Project Number 4765" "la Caixa Junior Leader Incoming (94978)".  
939

940 **Author contributions**

941 E.T. supervised the project. N.G., J-P. S-J. and E.T. designed the experiments. N.G, A.B, F.B,  
942 B.B and ET performed the experiments. J.M and E.B performed the ChIP-PCR. N.G., J-P. S-J.  
943 and E.T. analysed the data. N.G. and E.T. organized the figures and supplementary materials.  
944 E.T. wrote the article with the participation of N.G. and J-P. S-J. All authors commented on the  
945 manuscript.  
946

947 **Competing interest declaration**

948 The authors declare no competing interests.  
949

950 Correspondence and requests for materials should be addressed to E.T.  
951 [eric.theveneau@univ-tlse3.fr](mailto:eric.theveneau@univ-tlse3.fr)
